# Supplementary material for: A systematic review of the behaviour change techniques and digital features in technology-driven type 2 diabetes prevention interventions
Source: PubMed Central journal article supplement (PMC7093696; doi:10.1177/2055207620914427), 2020-03-24
Supplement: DHJ914427_Supplementary_Material3.pdf [file DHJ914427_Supplementary_Material3.pdf]

References for All Included Articles

---

| Study (year)            | Reference(s)                                                                                                                                                                                                                                                                                                                                                                                                                                                                                                                                                                                                                                                                                                                                                                                                                                                                                                                                                                                                                                                                                                                                                                                                                                                                                                                                                                                                                                                                                                                                                                                                                                                                                                                                                                                                                                                                                                                                                                                                                                             |
|-------------------------|----------------------------------------------------------------------------------------------------------------------------------------------------------------------------------------------------------------------------------------------------------------------------------------------------------------------------------------------------------------------------------------------------------------------------------------------------------------------------------------------------------------------------------------------------------------------------------------------------------------------------------------------------------------------------------------------------------------------------------------------------------------------------------------------------------------------------------------------------------------------------------------------------------------------------------------------------------------------------------------------------------------------------------------------------------------------------------------------------------------------------------------------------------------------------------------------------------------------------------------------------------------------------------------------------------------------------------------------------------------------------------------------------------------------------------------------------------------------------------------------------------------------------------------------------------------------------------------------------------------------------------------------------------------------------------------------------------------------------------------------------------------------------------------------------------------------------------------------------------------------------------------------------------------------------------------------------------------------------------------------------------------------------------------------------------|
| Aguiar et al.<br>(2016) | <p>*Aguiar, E. J., Morgan, P. J., Collins, C. E., Plotnikoff, R. C., Young, M. D., &amp; Callister, R. (2016). Efficacy of the type 2 diabetes prevention using lifestyle education program RCT. <i>American Journal of Preventive Medicine</i>, 50(3), 353-364. doi: 10.1016/j.amepre.2015.08.020</p> <p>Aguiar, E. J., Morgan, P. J., Collins, C. E., Plotnikoff, R. C., Young, M. D., &amp; Callister, R. (2014). The PULSE (Prevention Using LifeStyle Education) trial protocol: a randomised controlled trial of a Type 2 Diabetes Prevention programme for men. <i>Contemporary Clinical Trials</i>, 39(1), 132-144. doi: 10.1016/j.cct.2014.07.008</p> <p>Aguiar, E. J., Morgan, P. J., Collins, C. E., Plotnikoff, R. C., Young, M. D., &amp; Callister, R. (2017). Process evaluation of the type 2 diabetes mellitus PULSE program randomized controlled trial: recruitment, engagement, and overall satisfaction. <i>American Journal of Men's Health</i>, 11(4), 1055-1068. doi: 10.1177/1557988317701783</p> <p>Rollo, M. E., Aguiar, E. J., Pursey, K. M., Morgan, P. J., Plotnikoff, R. C., Young, M. D., ... &amp; Callister, R. (2017). Impact on dietary intake of a self-directed, gender-tailored diabetes prevention program in men. <i>World Journal of Diabetes</i>, 8(8), 414. doi: 10.4239/wjd.v8.i8.414</p> <p>Morgan, P. J., Callister, R., Collins, C. E., Plotnikoff, R. C., Young, M. D., Berry, N., ... &amp; Saunders, K. L. (2012). The SHED-IT community trial: a randomized controlled trial of internet-and paper-based weight loss programs tailored for overweight and obese men. <i>Annals of Behavioral Medicine</i>, 45(2), 139-152. doi: 10.1007/s12160-012-9424-z</p> <p>Morgan, P. J., Collins, C. E., Plotnikoff, R. C., McElduff, P., Burrows, T., Warren, J. M., ... &amp; Callister, R. (2010). The SHED-IT community trial study protocol: a randomised controlled trial of weight loss programs for overweight and obese men. <i>BMC Public Health</i>, 10(1), 701. doi: 10.1186/1471-2458-10-701</p> |
| Arens et al.<br>(2018)  | <p>*Arens, J. H., Hauth, W., &amp; Weissmann, J. (2018). Novel app-and web-supported diabetes prevention program to promote weight reduction, physical activity, and a healthier lifestyle: observation of the clinical application. <i>Journal of Diabetes Science and Technology</i>, 12(4), 831-838. doi: 10.1177/1932296818768621</p>                                                                                                                                                                                                                                                                                                                                                                                                                                                                                                                                                                                                                                                                                                                                                                                                                                                                                                                                                                                                                                                                                                                                                                                                                                                                                                                                                                                                                                                                                                                                                                                                                                                                                                                |

---

| Study                              | Reference(s)                                                                                                                                                                                                                                                                                                                                                                                                                                                                                                                                                                                                                                                                                                                                                                                                                                                                                                                                                                                                               |
|------------------------------------|----------------------------------------------------------------------------------------------------------------------------------------------------------------------------------------------------------------------------------------------------------------------------------------------------------------------------------------------------------------------------------------------------------------------------------------------------------------------------------------------------------------------------------------------------------------------------------------------------------------------------------------------------------------------------------------------------------------------------------------------------------------------------------------------------------------------------------------------------------------------------------------------------------------------------------------------------------------------------------------------------------------------------|
| Block et al.<br>(2015)             | <p>*Block, G., Azar, K. M., Romanelli, R. J., Block, T. J., Hopkins, D., Carpenter, H. A., ... &amp; Block, C. H. (2015). Diabetes prevention and weight loss with a fully automated behavioral intervention by email, web, and mobile phone: a randomized controlled trial among persons with prediabetes. <i>Journal of Medical Internet Research</i>, 17(10), e240. doi: 10.2196/jmir.4897</p> <p>Block, G., Azar, K. M., Block, T. J., Romanelli, R. J., Carpenter, H., Hopkins, D., ... &amp; Block, C. H. (2015). A fully automated diabetes prevention program, Alive-PD: program design and randomized controlled trial protocol. <i>JMIR Research Protocols</i>, 4(1), e3. doi: 10.2196/resprot.4046</p> <p>Block, G., Azar, K. M. J., Romanelli, R. J., Block, T. J., Palaniappan, L. P., Dolginsky, M., &amp; Block, C. H. (2016). Improving diet, activity and wellness in adults at risk of diabetes: randomized controlled trial. <i>Nutrition &amp; Diabetes</i>, 6(9), e231. doi: 10.1038/nutd.2016.42</p> |
| Castro Sweet et al. (2018)         | <p>*Castro Sweet, C. M., Chiguluri, V., Gumpina, R., Abbott, P., Madero, E. N., Payne, M., ... &amp; Prewitt, T. (2018). Outcomes of a digital health program with human coaching for diabetes risk reduction in a Medicare population. <i>Journal of Aging and Health</i>, 30(5), 692-710. doi: 10.1177/0898264316688791</p>                                                                                                                                                                                                                                                                                                                                                                                                                                                                                                                                                                                                                                                                                              |
| Cha et al.<br>(2014)               | <p>*Cha, E., Kim, K. H., Umpierrez, G., Dawkins, C. R., Bello, M. K., Lerner, H. M., ... &amp; Dunbar, S. B. (2014). A feasibility study to develop a diabetes prevention program for young adults with prediabetes by using digital platforms and a handheld device. <i>The Diabetes Educator</i>, 40(5), 626-637. doi: 10.1177/0145721714539736</p> <p>Cha, E., Umpierrez, G., Kim, K. H., Bello, M. K., &amp; Dunbar, S. B. (2013). Characteristics of American young adults with increased risk for type 2 diabetes: a pilot study. <i>The Diabetes Educator</i>, 39(4), 454-463. doi: 10.1177/0145721713486199</p>                                                                                                                                                                                                                                                                                                                                                                                                    |
| Estabrooks and Smith-Ray<br>(2008) | <p>*Estabrooks, P. A., &amp; Smith-Ray, R. L. (2008). Piloting a behavioral intervention delivered through interactive voice response telephone messages to promote weight loss in a pre-diabetic population. <i>Patient Education and Counseling</i>, 72(1), 34-41. doi: 10.1016/j.pec.2008.01.007</p>                                                                                                                                                                                                                                                                                                                                                                                                                                                                                                                                                                                                                                                                                                                    |
| Everett et al.<br>(2018)           | <p>*Everett, E., Kane, B., Yoo, A., Dobs, A., &amp; Mathioudakis, N. (2018). A novel approach for fully automated, personalized health coaching for adults with prediabetes: pilot clinical trial. <i>Journal of Medical Internet Research</i>, 20(2), e72. doi: 10.2196/jmir.9723</p>                                                                                                                                                                                                                                                                                                                                                                                                                                                                                                                                                                                                                                                                                                                                     |

| Study                    | Reference(s)                                                                                                                                                                                                                                                                                                                                                                                 |
|--------------------------|----------------------------------------------------------------------------------------------------------------------------------------------------------------------------------------------------------------------------------------------------------------------------------------------------------------------------------------------------------------------------------------------|
| Fischer et al.<br>(2016) | *Fischer, H. H., Fischer, I. P., Pereira, R. I., Furniss, A. L., Rozwadowski, J. M., Moore, S. L., ... & Havranek, E. P. (2016). Text message support for weight loss in patients with prediabetes: a randomized clinical trial. <i>Diabetes Care</i> , 39(8), 1364-1370. doi: 10.2337/dc15-2137                                                                                             |
| Fukuoka et al.<br>(2015) | *Fukuoka, Y., Gay, C. L., Joiner, K. L., & Vittinghoff, E. (2015). A novel diabetes prevention intervention using a mobile app: a randomized controlled trial with overweight adults at risk. <i>American Journal of Preventive Medicine</i> , 49(2), 223-237. doi: 10.1016/j.amepre.2015.01.003                                                                                             |
| Kramer et al.<br>(2010)  | *Kramer, M. K., Kriska, A. M., Venditti, E. M., Semler, L. N., Miller, R. G., McDonald, T., ... & Orchard, T. J. (2010). A novel approach to diabetes prevention: evaluation of the Group Lifestyle Balance program delivered via DVD. <i>Diabetes Research and Clinical Practice</i> , 90(3), e60-e63. doi: 10.1016/j.diabres.2010.08.013                                                   |
| Limaye et al.<br>(2017)  | *Limaye, T., Kumaran, K., Joglekar, C., Bhat, D., Kulkarni, R., Nanivadekar, A., & Yajnik, C. (2017). Efficacy of a virtual assistance-based lifestyle intervention in reducing risk factors for Type 2 diabetes in young employees in the information technology industry in India: LIMIT, a randomized controlled trial. <i>Diabetic Medicine</i> , 34(4), 563-568. doi: 10.1111/dme.13258 |
| Ma et al.<br>(2013)      | *Ma, J., Yank, V., Xiao, L., Lavori, P. W., Wilson, S. R., Rosas, L. G., & Stafford, R. S. (2013). Translating the Diabetes Prevention Program lifestyle intervention for weight loss into primary care: a randomized trial. <i>JAMA Internal Medicine</i> , 173(2), 113-121. doi: 10.1001/2013.jamainternmed.987                                                                            |
|                          | Azar, K. M., Xiao, L., & Ma, J. (2013). Baseline obesity status modifies effectiveness of adapted diabetes prevention program lifestyle interventions for weight management in primary care. <i>BioMed Research International</i> , 2013. doi: 10.1155/2013/191209                                                                                                                           |
|                          | Ma, J., King, A. C., Wilson, S. R., Xiao, L., & Stafford, R. S. (2009). Evaluation of lifestyle interventions to treat elevated cardiometabolic risk in primary care (E-LITE): a randomized controlled trial. <i>BMC Family Practice</i> , 10(1), 71. doi: 10.1186/1471-2296-10-71                                                                                                           |
|                          | Ma, J., Xiao, L., & Blonstein, A. C. (2013). Measurement of self-monitoring web technology acceptance and use in an e-health weight-loss trial. <i>Telemedicine and e-Health</i> , 19(10), 739-745. doi: 10.1089/tmj.2013.0009                                                                                                                                                               |
|                          | Xiao, L., Yank, V., Wilson, S. R., Lavori, P. W., & Ma, J. (2013). Two-year weight-loss maintenance in primary care-based Diabetes Prevention Program lifestyle interventions. <i>Nutrition &amp; Diabetes</i> , 3(6), e76. doi: 10.1038/nutd.2013.17                                                                                                                                        |

| Study                      | Reference(s)                                                                                                                                                                                                                                                                                                                                                                                           |
|----------------------------|--------------------------------------------------------------------------------------------------------------------------------------------------------------------------------------------------------------------------------------------------------------------------------------------------------------------------------------------------------------------------------------------------------|
| Michaelides et al. (2016)  | <p>*Michaelides, A., Raby, C., Wood, M., Farr, K., &amp; Toro-Ramos, T. (2016). Weight loss efficacy of a novel mobile Diabetes Prevention Program delivery platform with human coaching. <i>BMJ Open Diabetes Research and Care</i>, 4(1), e000264. doi: 10.1136/bmjdr-2016-000264</p>                                                                                                                |
|                            | <p>Michaelides, A., Major, J., Pienkosz Jr, E., Wood, M., Kim, Y., &amp; Toro-Ramos, T. (2018). Usefulness of a novel mobile diabetes prevention program delivery platform with human coaching: 65-week observational follow-up. <i>JMIR mHealth and uHealth</i>, 6(5), e93. doi: 10.2196/mhealth.9161</p>                                                                                             |
| Piatt et al. (2013)        | <p>*Piatt, G. A., Seidel, M. C., Powell, R. O., &amp; Zgibor, J. C. (2013). Comparative effectiveness of lifestyle intervention efforts in the community: results of the Rethinking Eating and ACTivity (REACT) study. <i>Diabetes Care</i>, 36(2), 202-209. doi: 10.2337/dc12-0824</p>                                                                                                                |
|                            | <p>Piatt, G. A., Seidel, M. C., Powell, R. O., &amp; Zgibor, J. C. (2016). Influence of patient-centered decision making on sustained weight loss and risk reduction following lifestyle intervention efforts in rural Pennsylvania. <i>The Diabetes Educator</i>, 42(3), 281-290. doi: 10.1177/0145721716636962</p>                                                                                   |
| Ramachandran et al. (2013) | <p>*Ramachandran, A., Snehalatha, C., Ram, J., Selvam, S., Simon, M., Nanditha, A., ... &amp; Oliver, N. (2013). Effectiveness of mobile phone messaging in prevention of type 2 diabetes by lifestyle modification in men in India: a prospective, parallel-group, randomised controlled trial. <i>The Lancet Diabetes &amp; Endocrinology</i>, 1(3), 191-198. doi: 10.1016/S2213-8587(13)70067-6</p> |
| Sepah et al. (2014)        | <p>*Sepah, S. C., Jiang, L., &amp; Peters, A. L. (2014). Translating the diabetes prevention program into an online social network: validation against CDC standards. <i>The Diabetes Educator</i>, 40(4), 435-443. doi: 10.1177/0145721714531339</p>                                                                                                                                                  |
|                            | <p>Sepah, S. C., Jiang, L., Ellis, R. J., McDermott, K., &amp; Peters, A. L. (2017). Engagement and outcomes in a digital Diabetes Prevention Program: 3-year update. <i>BMJ Open Diabetes Research and Care</i>, 5(1), e000422. doi: 10.1136/bmjdr-2017-000422</p>                                                                                                                                    |
|                            | <p>Sepah, S. C., Jiang, L., &amp; Peters, A. L. (2015). Long-term outcomes of a Web-based diabetes prevention program: 2-year results of a single-arm longitudinal study. <i>Journal of Medical Internet Research</i>, 17(4), e92. doi: 10.2196/jmir.4052</p>                                                                                                                                          |
|                            | <p>Su, W., Chen, F., Dall, T. M., Iacobucci, W., &amp; Perreault, L. (2016). Return on Investment for Digital Behavioral Counseling in Patients With Prediabetes and Cardiovascular Disease. <i>Preventing Chronic Disease</i>, 13, E13. doi:10.5888/pcd13.150357</p>                                                                                                                                  |

| Study                   | Reference(s)                                                                                                                                                                                                                                                                                                                                                                 |
|-------------------------|------------------------------------------------------------------------------------------------------------------------------------------------------------------------------------------------------------------------------------------------------------------------------------------------------------------------------------------------------------------------------|
| Tate et al.<br>(2003)   | *Tate, D. F., Jackvony, E. H., & Wing, R. R. (2003). Effects of Internet behavioral counseling on weight loss in adults at risk for type 2 diabetes: a randomized trial. <i>JAMA</i> , 289(14), 1833-1836. doi: 10.1001/jama.289.14.1833                                                                                                                                     |
| Wong et al.<br>(2013)   | * Wong, C. K., Fung, C. S., Siu, S. C., Lo, Y. Y., Wong, K. W., Fong, D. Y., & Lam, C. L. (2013). A short message service (SMS) intervention to prevent diabetes in Chinese professional drivers with pre-diabetes: a pilot single-blinded randomized controlled trial. <i>Diabetes Research and Clinical Practice</i> , 102(3), 158-166. doi: 10.1016/j.diabres.2013.10.002 |
|                         | Wong, C. K., Jiao, F. F., Siu, S. C., Fung, C. S., Fong, D. Y., Wong, K. W., ... & Lam, C. L. (2016). Cost-effectiveness of a short message service intervention to prevent type 2 diabetes from impaired glucose tolerance. <i>Journal of Diabetes Research</i> , 2016. doi: 10.1155/2016/1219581                                                                           |
| Wilson et al.<br>(2017) | * Wilson, M. G., Sweet, C. M. C., Edge, M. D., Madero, E. N., McGuire, M., Pilsmaker, M., ... & Kirschner, S. (2017). Evaluation of a digital behavioral counseling program for reducing risk factors for chronic disease in a workforce. <i>Journal of Occupational and Environmental Medicine</i> , 59(8), e150. doi: 10.1097/JOM.0000000000001091                         |

\*Main study paper
