# Supplementary material for: A systematic review of the behaviour change techniques and digital features in technology-driven type 2 diabetes prevention interventions
Source: PubMed Central journal article supplement (PMC7093696; doi:10.1177/2055207620914427), 2020-03-24
Supplement: DHJ914427_Supplementary_Material4.pdf [file DHJ914427_Supplementary_Material4.pdf]

Supplementary Table 1.

*Quality Assessment Summaries for All Studies*

| Checklist criteria                                             | Aguilar (2016) | Arens (2018) | Block (2015) | Castro Sweet (2017) | Cha (2014) | Estabrooks (2008) | Everett (2018) | Fischer (2016) | Fukuoka (2015) | Kramer (2010) | Limaye (2017) | Ma (2013) | Michaelides (2016) | Piatt (2013) | Ramachandran (2013) | Sepah (2014) | Tate (2003) | Wilson (2017) | Wong (2013) |
|----------------------------------------------------------------|----------------|--------------|--------------|---------------------|------------|-------------------|----------------|----------------|----------------|---------------|---------------|-----------|--------------------|--------------|---------------------|--------------|-------------|---------------|-------------|
| 1.1 Source population or area well described                   | ++             | +            | ++           | +                   | ++         | ++                | ++             | ++             | ++             | ++            | ++            | ++        | +                  | ++           | ++                  | +            | ++          | ++            | ++          |
| 1.2 Eligible population or area representative                 | ++             | +            | ++           | +                   | ++         | +                 | +              | ++             | ++             | ++            | ++            | +         | +                  | ++           | ++                  | +            | +           | ++            | ++          |
| 1.3 Selected participants or areas representative              | ++             | +            | ++           | ++                  | +          | ++                | ++             | ++             | +              | +             | +             | +         | +                  | ++           | ++                  | +            | +           | ++            | ++          |
| 2.1 Allocation: selection bias minimised                       | ++             | +            | ++           | NA                  | NA         | ++                | +              | ++             | ++             | +             | ++            | ++        | NA                 | +            | ++                  | NA           | ++          | NA            | ++          |
| 2.2 Interventions (& comparisons) well described & appropriate | ++             | +            | ++           | ++                  | ++         | ++                | ++             | ++             | ++             | ++            | ++            | ++        | +                  | ++           | ++                  | ++           | ++          | ++            | ++          |
| 2.3 Allocation concealed                                       | ++             | NR           | NR           | NA                  | NA         | NR                | +              | NR             | ++             | NA            | NR            | NR        | NA                 | +            | +                   | NA           | NR          | NA            | +           |
| 2.4 Participants &/or investigators blinded                    | NA             | NA           | NA           | NA                  | NA         | NA                | NA             | NA             | NA             | NA            | NA            | NA        | NA                 | NA           | NA                  | NA           | NA          | NA            | NA          |
| 2.5 Exposure to intervention & comparison adequate             | ++             | +            | ++           | NA                  | NA         | ++                | ++             | ++             | ++             | ++            | ++            | ++        | NA                 | +            | ++                  | NA           | ++          | NA            | ++          |
| 2.6 Contamination Acceptably low                               | ++             | ++           | ++           | NA                  | NA         | ++                | ++             | +              | ++             | ++            | ++            | ++        | NA                 | ++           | ++                  | NA           | ++          | NA            | ++          |
| 2.7 Other interventions similar in groups                      | ++             | ++           | ++           | NA                  | NA         | ++                | +              | +              | ++             | ++            | ++            | +         | NA                 | +            | ++                  | NA           | ++          | +             | ++          |
| 2.8 All participants accounted for at study conclusion         | ++             | +            | ++           | ++                  | ++         | +                 | ++             | ++             | ++             | +             | +             | ++        | ++                 | +            | ++                  | +            | ++          | +             | +           |

|      |                                                                     |    |    |    |    |    |    |    |    |    |    |    |    |    |    |    |    |    |    |    |
|------|---------------------------------------------------------------------|----|----|----|----|----|----|----|----|----|----|----|----|----|----|----|----|----|----|----|
| 2.9  | Setting reflects usual UK practice                                  | +  | ++ | ++ | +  | +  | ++ | +  | ++ | ++ | ++ | +  | ++ | +  | +  | +  | +  | +  | +  | +  |
| 2.10 | Intervention or control reflects usual UK practice                  | +  | ++ | ++ | +  | +  | ++ | +  | ++ | ++ | ++ | +  | ++ | +  | +  | +  | +  | ++ | +  | +  |
| 3.1  | Outcome measures reliable                                           | ++ | +  | ++ | ++ | ++ | ++ | ++ | ++ | ++ | ++ | ++ | ++ | ++ | ++ | ++ | ++ | ++ | ++ | ++ |
| 3.2  | Outcome measures complete                                           | ++ | ++ | ++ | +  | ++ | ++ | ++ | ++ | ++ | ++ | ++ | ++ | ++ | ++ | ++ | +  | ++ | +  | +  |
| 3.3  | All important outcomes assessed                                     | ++ | +  | ++ | ++ | ++ | ++ | ++ | ++ | ++ | ++ | ++ | ++ | +  | ++ | +  | ++ | ++ | ++ | ++ |
| 3.4  | Outcomes relevant                                                   | ++ | ++ | ++ | ++ | ++ | ++ | ++ | ++ | ++ | ++ | ++ | ++ | ++ | ++ | ++ | ++ | ++ | ++ | ++ |
| 3.5  | Similar follow-up times in groups                                   | ++ | +  | ++ | NA | NA | ++ | ++ | ++ | ++ | ++ | ++ | ++ | NA | ++ | ++ | NA | ++ | NA | ++ |
| 3.6  | Follow-up time meaningful                                           | +  | +  | +  | ++ | +  | +  | +  | ++ | +  | +  | ++ | ++ | +  | ++ | ++ | ++ | ++ | ++ | ++ |
| 4.1  | Groups similar at baseline                                          | ++ | +  | ++ | NA | NA | ++ | +  | ++ | ++ | +  | ++ | ++ | NA | ++ | ++ | NA | ++ | NA | ++ |
| 4.2  | ITT analysis conducted                                              | ++ | +  | ++ | ++ | +  | ++ | +  | ++ | ++ | ++ | ++ | ++ | ++ | ++ | ++ | ++ | ++ | ++ | ++ |
| 4.3  | Study sufficiently powered                                          | ++ | +  | +  | NR | +  | NR | +  | ++ | ++ | ++ | ++ | ++ | ++ | ++ | ++ | NR | +  | NR | NR |
| 4.4  | Estimates of effect size given or calculable                        | ++ | ++ | +  | ++ | ++ | ++ | ++ | +  | ++ | ++ | ++ | ++ | ++ | +  | ++ | ++ | ++ | ++ | ++ |
| 4.5  | Analytical methods appropriate                                      | ++ | +  | ++ | ++ | ++ | +  | ++ | +  | ++ | ++ | ++ | ++ | ++ | ++ | ++ | +  | ++ | ++ | ++ |
| 4.6  | Precision of intervention effects given or calculable               | ++ | ++ | ++ | ++ | ++ | ++ | ++ | ++ | ++ | ++ | ++ | ++ | ++ | ++ | ++ | ++ | ++ | ++ | ++ |
| 5.1  | Study results internally valid (i.e. unbiased)                      | ++ | +  | ++ | ++ | +  | ++ | +  | ++ | ++ | ++ | ++ | ++ | ++ | +  | ++ | ++ | ++ | ++ | ++ |
| 5.2  | Findings generalisable to source population (i.e. externally valid) | ++ | +  | ++ | +  | +  | ++ | +  | ++ | +  | ++ | ++ | +  | +  | ++ | ++ | +  | +  | ++ | ++ |

Supplementary Table 2.

*The Proportion of Baseline Weight Lost at Each Follow-Up for Interventions Included in the Primary Effectiveness Analysis*

| Study (year)<br><i>Intervention</i> | Follow-up point |                                        |              |                                        |                        |              |                                        |               |                        |                        |
|-------------------------------------|-----------------|----------------------------------------|--------------|----------------------------------------|------------------------|--------------|----------------------------------------|---------------|------------------------|------------------------|
|                                     | Short Term      |                                        |              |                                        | Long Term              |              |                                        |               |                        |                        |
|                                     | 3 months        | 16 weeks                               | 5 months     | 6 months                               | 12 months              | 15 months    | 65 weeks                               | 18 months     | 24 months              | 36 months              |
| Aguiar (2016)                       | <b>-3.74%</b>   | -                                      | -            | <b>-4.85%</b>                          | -                      | -            | -                                      | -             | -                      | -                      |
| Block (2018)                        | -               | -                                      | -            | <b>-3.60%</b>                          | -                      | -            | -                                      | -             | -                      | -                      |
| Castro Sweet (2017)                 | -               | <b>-6.5%</b>                           | -            | <b>-8.0%</b>                           | <b>-7.5%</b>           | -            | -                                      | -             | -                      | -                      |
| Cha (2014)*                         | -2.50%          | -                                      | -            | -                                      | -                      | -            | -                                      | -             | -                      | -                      |
| Estabrooks (2008)                   | -2.63%          | -                                      | -            | -                                      | -                      | -            | -                                      | -             | -                      | -                      |
| Everett (2018)*                     | -1.9%           | -                                      | -            | -                                      | -                      | -            | -                                      | -             | -                      | -                      |
| Fischer (2016)                      | -               | -                                      | -            | -1.93%                                 | -1.35%                 | -            | -                                      | -             | -                      | -                      |
| Fukuoka (2015)                      | <b>-5.8%</b>    | -                                      | <b>-6.8%</b> | -                                      | -                      | -            | -                                      | -             | -                      | -                      |
| Kramer (2010)                       | <b>-5.6%</b>    | -                                      | -            | -                                      | -                      | -            | -                                      | -             | -                      | -                      |
| Limaye (2017)                       | -0.73%          | -                                      | -            | -1.48%                                 | -1.35%                 | -            | -                                      | -             | -                      | -                      |
| Ma (2013)                           | <b>-4.9%</b>    | -                                      | -            | <b>-4.7%</b>                           | -                      | <b>-5.0%</b> | -                                      | -             | -                      | -                      |
| Michaelides (2016)                  | -               | <b>-5.65% (S)</b><br><b>-6.33% (C)</b> | -            | <b>-6.58% (S)</b><br><b>-7.50% (C)</b> | -                      | -            | <b>-6.15% (S)</b><br><b>-7.36% (C)</b> | -             | -                      | -                      |
| Piatt (2013) <i>DVD</i>             | <b>-5.67%</b>   | -                                      | -            | <b>-3.49%</b>                          | -                      | -            | -                                      | -4.6%         | -                      | -                      |
| Piatt (2013) <i>Internet</i>        | <b>-6.26%</b>   | -                                      | -            | <b>-3.11%</b>                          | -                      | -            | -                                      | <b>-5.25%</b> | -                      | -                      |
| Sepah (2014)                        | -               | <b>-5.0% (S)</b><br><b>-5.2% (C)</b>   | -            | -                                      | -4.7% (S)<br>-4.9% (C) | -            | -                                      | -             | -4.2% (S)<br>-4.3% (C) | -3.0% (S)<br>-2.9% (C) |
| Tate (2003) <i>BI</i>               | <b>-3.02%</b>   | -                                      | -            | -2.80%                                 | -2.24%                 | -            | -                                      | -             | -                      | -                      |
| Tate (2003) <i>BeC</i>              | <b>-4.76%</b>   | -                                      | -            | <b>-6.03%</b>                          | -4.8%                  | -            | -                                      | -             | -                      | -                      |
| Wilson (2017)                       | -               | <b>-4.6%</b>                           | -            | -                                      | -0.93%                 | -            | -                                      | -             | -                      | -                      |
| Wong (2013)                         | -               | -                                      | -            | -0.69%                                 | -1.57%                 | -            | -                                      | -             | -1.47%                 | -                      |

*Note:* S: starters, defined as participants who read at least one article during any 4 of the 16 initial intervention weeks; C: Completers, defined as participants who read at least one article per week during any 9 of the 16 weeks. Bold text denotes clinically significant weight loss.

\*Studies that applied per-protocol or similar analyses only, rather than intention-to-treat.

Supplementary Table 3.

*Changes in Body Weight and Glycaemia from Baseline to Most Recent Follow-up (Expressed in Mean Values Unless Otherwise Indicated)*

| Author(s)<br>(year)<br><i>Intervention</i> | Weight change                                                                                                                                                                                                                                       | Proportion of sample that<br>achieved target weight loss <sup>‡</sup>                                                     | Change in A1c                                                                                                                                                                   | Change in Fasting Glucose                                                                                                                                                                      |
|--------------------------------------------|-----------------------------------------------------------------------------------------------------------------------------------------------------------------------------------------------------------------------------------------------------|---------------------------------------------------------------------------------------------------------------------------|---------------------------------------------------------------------------------------------------------------------------------------------------------------------------------|------------------------------------------------------------------------------------------------------------------------------------------------------------------------------------------------|
| Aguiar et al.<br>(2016)                    | <i>At 6 months</i><br>Intervention ( <i>n</i> = 53)<br>-5 kg ( <i>p</i> < .05)*<br>Control ( <i>n</i> = 48)<br>+0.5 kg ( <i>p</i> > .05)<br>[ <i>p</i> < .001, <i>d</i> = 1.15]*                                                                    | <i>At 6 months</i><br>5% weight loss<br>Intervention: 42.1%<br>Control: 4.8%<br>[ <i>p</i> < .001]*                       | <i>At 6 months</i><br>Intervention ( <i>n</i> = 53)<br>-0.4% ( <i>p</i> < .05)*<br>Control ( <i>n</i> = 48)<br>-0.2% ( <i>p</i> < .05)*<br>[ <i>p</i> = .002, <i>d</i> = 0.64]* | <i>FPG at 6 months</i><br>Intervention ( <i>n</i> = 53)<br>-0.08 mmol/L ( <i>p</i> > .05)<br>Control ( <i>n</i> = 48)<br>-0.03 mmol/L ( <i>p</i> > .05)<br>[ <i>p</i> = .742, <i>d</i> = 0.07] |
| Arens et al.<br>(2018) †                   | <i>Intervention: At 8.3 months</i><br><i>Standard care: at 11.6 months</i><br>Intervention ( <i>n</i> = 109)<br>-2.4 kg ( <i>p</i> < .0001)*<br>Standard Care ( <i>n</i> = 57)<br>-0.01kg ( <i>p</i> = .99)<br>[ <i>p</i> = .057] adj. for baseline | <i>Over time</i><br>Chance to achieve 5%<br>weight reduction.<br>Intervention: 6.2<br>times greater than<br>Standard Care | Not<br>Reported                                                                                                                                                                 | Not<br>Reported                                                                                                                                                                                |
| Block et al.<br>(2015)                     | <i>At 6 months</i><br>Intervention ( <i>n</i> = 163)<br>-3.3 kg<br>Control ( <i>n</i> = 176)<br>-1.26 kg<br>[ <i>p</i> < .001]*                                                                                                                     | <i>At 6 months</i><br>5% weight loss<br>Intervention: 35.3%<br>Control: 8.3%                                              | <i>At 6 months</i><br>Intervention ( <i>n</i> = 163)<br>-0.26%<br>Control ( <i>n</i> = 176)<br>-0.18%<br>[ <i>p</i> < .001]*                                                    | <i>FG at 6 months</i><br>Intervention ( <i>n</i> = 163)<br>-0.41 mmol/L<br>Control ( <i>n</i> = 176)<br>-0.12 mmol/L<br>[ <i>p</i> < .001]*                                                    |
| Castro Sweet et al.<br>(2018)              | <i>At 12 months</i><br>Intervention ( <i>n</i> = 501)<br>-7.1 kg ( <i>p</i> = .001)*<br>Control: NA                                                                                                                                                 | Not<br>Reported                                                                                                           | <i>At 12 months</i><br>Intervention ( <i>n</i> = 69)<br>-0.14% ( <i>p</i> = .0001)*<br>Control: NA                                                                              | Not<br>Reported                                                                                                                                                                                |

| Author(s)<br>(year)<br><i>Intervention</i> | Weight change                                                                                                                                                    | Proportion of sample that<br>achieved target weight loss <sup>‡</sup>                                | Change in A1c                                                                                                                                                   | Change in Fasting Glucose                                                                                                                                               |
|--------------------------------------------|------------------------------------------------------------------------------------------------------------------------------------------------------------------|------------------------------------------------------------------------------------------------------|-----------------------------------------------------------------------------------------------------------------------------------------------------------------|-------------------------------------------------------------------------------------------------------------------------------------------------------------------------|
| Cha et al.<br>(2014) †                     | <i>At 3 months</i><br>Intervention ( <i>n</i> = 13)<br>-2.9 kg<br>( <i>p</i> = .031, <i>d</i> = -0.12)*<br>Control: NA                                           | Not<br>Reported                                                                                      | <i>At 3 months</i><br>Intervention ( <i>n</i> = 13)<br>-0.4%<br>( <i>p</i> = .007, <i>d</i> = -0.76)*<br>Control: NA                                            | <i>FG at 3 months</i><br>Intervention ( <i>n</i> = 13)<br>+0.28 mmol/L ( <i>p</i> = .112, <i>d</i> = 0.39)<br>Control: NA                                               |
| Estabrooks and<br>Smith-Ray<br>(2008)      | <i>At 3 months</i><br>Intervention ( <i>n</i> = 28)<br>-2.3 kg<br>Control ( <i>n</i> = 31)<br>-2 kg<br>[ <i>p</i> = .13] [when adjusting for<br>baseline values] | Not<br>Reported                                                                                      | Not<br>Reported                                                                                                                                                 | Not<br>Reported                                                                                                                                                         |
| Everett et al.<br>(2018) †                 | <i>At 3 months</i><br>Intervention ( <i>n</i> = 38)<br>-1.6 kg ( <i>p</i> = .02)*<br>Calibration ( <i>n</i> = 9): not reported                                   | Not<br>Reported                                                                                      | <i>At 3 months</i><br><i>Change in median values</i><br>Intervention ( <i>n</i> = 38)<br>-0.10% ( <i>p</i> = .04)*<br>Calibration ( <i>n</i> = 9): not reported | <i>FG at 3 months</i><br><i>Change in median values</i><br>Intervention ( <i>n</i> = 38)<br>-0.01 mmol/L ( <i>p</i> = .59)<br>Calibration ( <i>n</i> = 9): not reported |
| Fischer et al.<br>(2016)                   | <i>At 12 months</i><br>Intervention ( <i>n</i> = 78)<br>-2.6 lbs<br>Control ( <i>n</i> = 79)<br>-0.56 lbs<br>[ <i>p</i> = .05]                                   | <i>At 12 months</i><br>5% weight loss<br>Intervention: 38.5%<br>Control: 21.5%<br>[ <i>p</i> = .02]* | <i>At 12 months</i><br>Intervention ( <i>n</i> = 78)<br>-0.09%<br>Control ( <i>n</i> = 79)<br>+0.19%<br>[ <i>p</i> = .07]                                       | Not<br>Reported                                                                                                                                                         |
| Fukuoka et al.<br>(2015)                   | <i>At 5 months</i><br>Intervention ( <i>n</i> = 30)<br>-6.2 kg<br>Control ( <i>n</i> = 31)<br>+0.3 kg<br>[ <i>p</i> < .001]*                                     | <i>At 5 months</i><br>10% weight loss<br>Intervention: 29%<br>Control: 0%                            | <i>At 5 months</i><br>Intervention ( <i>n</i> = 30)<br>-0.10%<br>Control ( <i>n</i> = 31)<br>-0.04%<br>[ <i>p</i> = .25]                                        | <i>FPG at 5 months</i><br>Intervention ( <i>n</i> = 30)<br>-0.02 mmol/L<br>Control ( <i>n</i> = 31)<br>+0.02 mmol/L<br>[ <i>p</i> = .63]                                |

| Author(s)<br>(year)<br><i>Intervention</i> | Weight change                                                                                                                                                                                            | Proportion of sample that<br>achieved target weight loss <sup>‡</sup>                                                                                                                                       | Change in A1c                                                                                                                            | Change in Fasting Glucose                                                                                                                                                                                                   |
|--------------------------------------------|----------------------------------------------------------------------------------------------------------------------------------------------------------------------------------------------------------|-------------------------------------------------------------------------------------------------------------------------------------------------------------------------------------------------------------|------------------------------------------------------------------------------------------------------------------------------------------|-----------------------------------------------------------------------------------------------------------------------------------------------------------------------------------------------------------------------------|
| Kramer et al.<br>(2010)                    | <i>At 3 months</i><br>DVD ( <i>n</i> = 22)<br>-5.4 kg ( <i>p</i> < .0001)*<br>Face-to-face ( <i>n</i> = 26)<br>-6.3 kg ( <i>p</i> < .0001)*                                                              | Not<br>Reported                                                                                                                                                                                             | <i>At 3 months</i><br>DVD ( <i>n</i> = 21)<br>-0.16% ( <i>p</i> = .002)*<br>Face-to-face ( <i>n</i> = 26)<br>-0.31% ( <i>p</i> < .0001)* | <i>FG at 3 months</i><br>DVD ( <i>n</i> = 21)<br>-0.26 mmol/L ( <i>p</i> = .003)*<br>Face-to-face ( <i>n</i> = 26)<br>+0.06 mmol/L ( <i>p</i> = .098)                                                                       |
| Limaye et al.<br>(2017)                    | <i>At 12 months</i><br>Intervention ( <i>n</i> = 133)<br>-1 kg<br>Control ( <i>n</i> = 132)<br>+0.7 kg<br>[ <i>p</i> < .001]*                                                                            | Not<br>Reported                                                                                                                                                                                             | Not<br>Reported                                                                                                                          | <i>FPG at 12 months</i><br>Intervention ( <i>n</i> = 133)<br>+0.19 mmol/L<br>Control ( <i>n</i> = 132)<br>+0.33 mmol/L<br>[ <i>p</i> = .022]*                                                                               |
| Ma et al.<br>(2013)                        | <i>At 15 months</i><br>Self-directed ( <i>n</i> = 81)<br>-4.5 kg<br>Coach-led ( <i>n</i> = 79)<br>-6.3 kg<br>Usual Care ( <i>n</i> = 81)<br>-2.4.kg<br>Self-directed vs Usual Care<br>[ <i>p</i> = .02]* | <i>At 15 months</i><br>5%, 7%, and 10% weight<br>loss<br>Intervention: 46.9%,<br>37.6%, and 17.2%<br>Usual care: 24.6%,<br>14.7%, and 3.5%<br>[ <i>p</i> = .007*, <i>p</i> = .006*, and <i>p</i><br>= .01*] | Not<br>Reported                                                                                                                          | <i>FPG at 15 months</i><br>Self-directed ( <i>n</i> = 81)<br>-0.15 mmol/L<br>Coach-led ( <i>n</i> = 79)<br>-0.23 mmol/L<br>Usual Care ( <i>n</i> = 81)<br>+0.01 mmol/L<br>Self-directed vs Usual Care<br>[ <i>p</i> = .01]* |
| Michaelides et al.<br>(2016)               | <i>At 65 weeks</i><br>Starters ( <i>n</i> = 59)<br>-5.9 kg ( <i>p</i> < .001)*<br>Completers ( <i>n</i> = 47)<br>-7.1 kg ( <i>p</i> < .001)*                                                             | Not<br>Reported                                                                                                                                                                                             | Not<br>Reported                                                                                                                          | Not<br>Reported                                                                                                                                                                                                             |

| Author(s)<br>(year)<br><i>Intervention</i>    | Weight change                                                                                                                                                                                                                                                               | Proportion of sample that<br>achieved target weight loss <sup>‡</sup>                            | Change in A1c                                                                                                                            | Change in Fasting Glucose                                                                                                                        |
|-----------------------------------------------|-----------------------------------------------------------------------------------------------------------------------------------------------------------------------------------------------------------------------------------------------------------------------------|--------------------------------------------------------------------------------------------------|------------------------------------------------------------------------------------------------------------------------------------------|--------------------------------------------------------------------------------------------------------------------------------------------------|
| Piatt et al.<br>(2013)<br><i>GLB-DVD</i>      | <i>At 18 months</i><br>DVD ( <i>n</i> = 64)<br>-4.5 kg ( <i>p</i> < .0001)*<br>Internet ( <i>n</i> = 44)<br>-5.2 kg ( <i>p</i> < .0001)*<br>Face-to-face ( <i>n</i> = 96)<br>-4.9 kg ( <i>p</i> < .0001)*<br>Self-selected ( <i>n</i> = 56)<br>-5.9 kg ( <i>p</i> < .0001)* | <i>At 6 months</i><br>5% weight loss<br>DVD: 51.5%<br>Internet: 57.1%<br>F2F: 51.9%<br>SS: 66.7% | Not<br>Reported                                                                                                                          | Not<br>Reported                                                                                                                                  |
| Piatt et al.<br>(2013)<br><i>GLB-Internet</i> | <i>At 18 months</i><br>Internet ( <i>n</i> = 44)<br>-5.2 kg ( <i>p</i> < .0001)*<br>DVD ( <i>n</i> = 64)<br>-4.5 kg ( <i>p</i> < .0001)*<br>Face-to-face ( <i>n</i> = 96)<br>-4.9 kg ( <i>p</i> < .0001)*<br>Self-selected ( <i>n</i> = 56)<br>-5.9 kg ( <i>p</i> < .0001)* | <i>At 6 months</i><br>5% weight loss<br>Internet: 57.1%<br>DVD: 51.5%<br>F2F: 51.9%<br>SS: 66.7% | Not<br>Reported                                                                                                                          | Not<br>Reported                                                                                                                                  |
| Ramachandran et al.<br>(2013)                 | Not<br>Reported                                                                                                                                                                                                                                                             | Not<br>Reported                                                                                  | Not<br>Reported                                                                                                                          | <i>FPG at 5 years</i><br>Intervention ( <i>n</i> = 171)<br>+0.4 mmol/L<br>Control ( <i>n</i> = 157)<br>+0.2 mmol/L<br>[ <i>not significant</i> ] |
| Sepah et al.<br>(2014)                        | <i>At 3 years</i><br>Core ( <i>n</i> = 187)<br>-3 kg ( <i>p</i> = .0009)*<br>Post-core ( <i>n</i> = 144)<br>-2.9 kg ( <i>p</i> = .0024)*                                                                                                                                    | <i>At 12 months</i><br>5% weight loss<br>Core: not reported<br>Post-core: 47%                    | <i>At 3 years</i><br>Core ( <i>n</i> = 187)<br>-0.31% ( <i>p</i> = .0008)*<br>Post-core ( <i>n</i> = 155)<br>-0.33% ( <i>p</i> = .0005)* | Not<br>Reported                                                                                                                                  |

| Author(s)<br>(year)<br><i>Intervention</i>                                     | Weight change                                                                                                 | Proportion of sample that<br>achieved target weight loss‡                                 | Change in A1c   | Change in Fasting Glucose                                                                                          |
|--------------------------------------------------------------------------------|---------------------------------------------------------------------------------------------------------------|-------------------------------------------------------------------------------------------|-----------------|--------------------------------------------------------------------------------------------------------------------|
| Tate et al.<br>(2003)<br><i>Basic Internet</i>                                 | <i>At 12 months</i><br>Basic Int (n = 46)<br>-2 kg<br>Int + BeC (n = 46)<br>-4.4 kg<br>[p = .04]* favours BeC | Not<br>Reported                                                                           | Not<br>Reported | <i>FBG at 12 months</i><br>Basic Int (n = 46): not reported<br>Int + BeC (n = 46): not reported<br>[p = .93]       |
| Tate et al.<br>(2003)<br><i>Internet and<br/>Behavioural e-<br/>Counseling</i> | <i>At 12 months</i><br>Int + BeC (n = 46)<br>-4.4 kg<br>Basic Int (n = 46)<br>-2 kg<br>[p = .04]* favours BeC | Not<br>Reported                                                                           | Not<br>Reported | <i>FBG at 12 months</i><br>Int + BeC (n = 46): NR<br>Basic Int (n = 46): NR<br>[p = .93]                           |
| Wilson et al.<br>(2017)                                                        | <i>At 12 months</i><br>Intervention (n = 634)<br>-0.9 kg<br>Control (n = 1,268)<br>+0.6 kg<br>[p < .05]*      | <i>At 12 months</i><br>5% weight loss<br>Intervention: 31%<br>Control: 20%<br>[p < .001]* | Not<br>Reported | <i>FBG at 12 months</i><br>Intervention (n = 634)<br>-0.08 mmol/L<br>Control (1,268)<br>+0.01 mmol/L<br>[p < .05]* |
| Wong et al.<br>(2013)                                                          | <i>At 24 months</i><br>Intervention (n = 54)<br>-1 kg<br>Control (n = 50)<br>-0.4 kg<br>[p = .094]            | Not<br>Reported                                                                           | Not<br>Reported | <i>FPG at 24 months</i><br>Intervention (n = 54)<br>+0.03 mmol/L<br>Control (N = 50)<br>+0.04 mmol/L<br>[p = .468] |

*Note:* For the purpose of standardisation, all body weights reported in lbs were converted to kg, and all fasting glucose measures reported in mg/dL were converted to mmol/L; (p): within-group result; [p]: between-group result; FG: fasting glucose; FBG: fasting blood glucose; FPG: fasting plasma glucose; NA: not applicable.

\*Statistically significant at  $p < .05$ ; †studies that applied per-protocol or similar analyses rather than intention to treat; ‡weight loss target as described by the authors of each study.



Supplementary Table 4.

*Behaviour Change Techniques Identified in All Interventions*

| No.                                  | Behaviour Change Technique                 | Aguilar (2016) | Arens (2018) | Block (2015) | Castro Sweet (2017) | Cha (2014) | Estabrooks (2008) | Everett (2018) | Fischer (2016) | Fukuoka (2015) | Kramer (2010) | Limaye (2017) | Ma (2013) | Michaelides (2016) | Piatt (2013) DVD | Piatt (2013) Internet | Ramachandran (2013) | Sepah (2014) | Tate (2003) BI | Tate (2003) BeC | Wilson (2017) | Wong (2013) | TOTAL (Inc. Imp.) | TOTAL (Exc. Imp.) |
|--------------------------------------|--------------------------------------------|----------------|--------------|--------------|---------------------|------------|-------------------|----------------|----------------|----------------|---------------|---------------|-----------|--------------------|------------------|-----------------------|---------------------|--------------|----------------|-----------------|---------------|-------------|-------------------|-------------------|
| Cluster One: Goals and planning      |                                            |                |              |              |                     |            |                   |                |                |                |               |               |           |                    |                  |                       |                     |              |                |                 |               |             |                   |                   |
| 1.1                                  | Goal setting (behaviour)                   | ✓              | ✓            | ✓            | *                   | ✓          | -                 | ✓              | *              | *              | *             | ✓             | ✓         | *                  | *                | *                     | -                   | ✓            | -              | -               | *             | -           | 16                | 8                 |
| 1.2                                  | Problem solving                            | -              | ✓            | -            | *                   | ✓          | ✓                 | -              | ✓              | ✓              | *             | -             | ✓         | *                  | ✓                | ✓                     | ✓                   | *            | -              | -               | *             | -           | 14                | 9                 |
| 1.3                                  | Goal setting (outcome)                     | ✓              | ✓            | ✓            | *                   | -          | -                 | ✓              | *              | *              | *             | ✓             | ✓         | *                  | ✓                | ✓                     | -                   | ✓            | -              | -               | *             | -           | 15                | 9                 |
| 1.4                                  | Action planning                            | ✓              | -            | ✓            | -                   | -          | ✓                 | -              | -              | -              | *             | -             | ✓         | -                  | *                | *                     | -                   | -            | -              | -               | -             | -           | 7                 | 4                 |
| 1.5                                  | Review behaviour goals                     | -              | -            | -            | -                   | ✓          | -                 | -              | -              | -              | ✓             | -             | ✓         | -                  | *                | *                     | -                   | -            | -              | -               | -             | -           | 5                 | 3                 |
| 1.7                                  | Review outcome goals                       | -              | -            | -            | -                   | -          | -                 | -              | -              | -              | ✓             | -             | *         | -                  | *                | *                     | -                   | -            | -              | -               | -             | -           | 4                 | 1                 |
| Cluster Two: Feedback and monitoring |                                            |                |              |              |                     |            |                   |                |                |                |               |               |           |                    |                  |                       |                     |              |                |                 |               |             |                   |                   |
| 2.2                                  | Feedback on behaviour                      | -              | ✓            | ✓            | *                   | ✓          | -                 | ✓              | *              | *              | *             | -             | *         | ✓                  | ✓                | ✓                     | -                   | ✓            | -              | ✓               | *             | -           | 15                | 9                 |
| 2.3                                  | Self-monitoring of behaviour               | ✓              | ✓            | ✓            | ✓                   | ✓          | -                 | ✓              | ✓              | ✓              | ✓             | -             | -         | ✓                  | ✓                | ✓                     | -                   | ✓            | ✓              | ✓               | ✓             | -           | 16                | 16                |
| 2.4                                  | Self-monitoring of outcome(s) of behaviour | -              | ✓            | ✓            | ✓                   | -          | -                 | ✓              | ✓              | ✓              | ✓             | -             | ✓         | ✓                  | ✓                | ✓                     | -                   | ✓            | ✓              | ✓               | ✓             | -           | 15                | 15                |
| 2.7                                  | Feedback on outcome(s) of behaviour        | -              | ✓            | -            | -                   | -          | -                 | -              | -              | -              | -             | -             | -         | -                  | -                | -                     | -                   | -            | -              | -               | -             | -           | 1                 | 1                 |
| Cluster Three: Social support        |                                            |                |              |              |                     |            |                   |                |                |                |               |               |           |                    |                  |                       |                     |              |                |                 |               |             |                   |                   |
| 3.1                                  | Social support (unspecified)               | ✓              | -            | ✓            | ✓                   | -          | -                 | -              | *              | *              | ✓             | ✓             | ✓         | *                  | *                | *                     | -                   | ✓            | -              | ✓               | ✓             | -           | 14                | 9                 |
| 3.2                                  | Social support (practical)                 | -              | -            | -            | -                   | -          | -                 | -              | -              | -              | -             | ✓             | -         | -                  | -                | -                     | -                   | -            | -              | -               | -             | -           | 1                 | 1                 |
| 3.3                                  | Social support (emotional)                 | -              | -            | -            | *                   | -          | -                 | -              | ✓              | ✓              | -             | -             | -         | *                  | -                | -                     | -                   | *            | -              | -               | *             | -           | 6                 | 2                 |



| No.                                      | Behaviour Change Technique                            | Aguiar 2016 | Arens 2018 | Block 2015 | Castro Sweet 2017 | Cha 2014 | Estabrooks 2008 | Everett 2018 | Fischer 2016 | Fukuoka 2015 | Kramer 2010 | Limaye 2017 | Ma 2013 | Michaelides 2016 | Piatt 2013 DVD | Piatt 2013 Internet | Ramachandran 2013 | Sepah 2014 | Tate 2003 BI | Tate 2003 BeC | Wilson 2017 | Wong 2013 | TOTAL (Inc. Imp.) | TOTAL (Exc. Imp.) |   |
|------------------------------------------|-------------------------------------------------------|-------------|------------|------------|-------------------|----------|-----------------|--------------|--------------|--------------|-------------|-------------|---------|------------------|----------------|---------------------|-------------------|------------|--------------|---------------|-------------|-----------|-------------------|-------------------|---|
| Cluster Eleven: Regulation               |                                                       |             |            |            |                   |          |                 |              |              |              |             |             |         |                  |                |                     |                   |            |              |               |             |           |                   |                   |   |
| 11.2                                     | Reduce negative emotions                              | -           | -          | ✓          | -                 | -        | -               | -            | -            | -            | -           | ✓           | -       | -                | -              | -                   | ✓                 | -          | -            | -             | -           | -         | 3                 | 3                 |   |
| Cluster Twelve Antecedents               |                                                       |             |            |            |                   |          |                 |              |              |              |             |             |         |                  |                |                     |                   |            |              |               |             |           |                   |                   |   |
| 12.3                                     | Avoidance/reducing exposure to cues for the behaviour | -           | -          | -          | -                 | -        | -               | -            | -            | -            | -           | ✓           | -       | -                | -              | -                   | -                 | -          | -            | -             | -           | -         | -                 | 1                 | 1 |
| 12.5                                     | Adding objects to the environment                     | ✓           | ✓          | -          | ✓                 | -        | -               | -            | -            | -            | ✓           | -           | ✓       | -                | ✓              | ✓                   | -                 | ✓          | -            | -             | *           | -         | 9                 | 8                 |   |
| Cluster Fourteen: Scheduled consequences |                                                       |             |            |            |                   |          |                 |              |              |              |             |             |         |                  |                |                     |                   |            |              |               |             |           |                   |                   |   |
| 14.4                                     | Reward approximation                                  | -           | -          | -          | -                 | -        | -               | ✓            | -            | -            | -           | -           | -       | -                | -              | -                   | -                 | -          | -            | -             | -           | -         | 1                 | 1                 |   |
| TOTAL BCTs (including imputed BCTs)      |                                                       | 13          | 3          | 10         | 11                | 10       | 11              | 6            | 2            | 10           | 13          | 10          | 10      | 10               | 13             | 13                  | 5                 | 5          | 2            | 2             | 11          | 1         |                   |                   |   |
| TOTAL BCTs (excluding imputed BCTs)      |                                                       | 13          | 3          | 10         | 5                 | 4        | 5               | 6            | 2            | 5            | 7           | 10          | 10      | 4                | 7              | 7                   | 5                 | 5          | 2            | 2             | 3           | 1         |                   |                   |   |

Note: ✓BCT explicitly present; \*BCT identified via imputation.

Supplementary Table 5.

*Digital Features Identified in All Interventions*

| Digital feature                          | Aguiar (2016) | Arens (2018) | Block (2015) | Castro Sweet (2017) | Cha (2014) | Estabrooks (2008) | Everett (2018) | Fischer (2016) | Fukuoka (2015) | Kramer (2010) | Limaye (2017) | Ma (2013) | Michaelides (2016) | Piatt (2013) DVD | Piatt (2013) Internet | Ramachandran (2013) | Sepah (2014) | Tate (2003) BI | Tate (2003) BeC | Wilson (2017) | Wong (2013) | TOTAL |
|------------------------------------------|---------------|--------------|--------------|---------------------|------------|-------------------|----------------|----------------|----------------|---------------|---------------|-----------|--------------------|------------------|-----------------------|---------------------|--------------|----------------|-----------------|---------------|-------------|-------|
| Passive features                         |               |              |              |                     |            |                   |                |                |                |               |               |           |                    |                  |                       |                     |              |                |                 |               |             |       |
| Health/Lifestyle information and advice  | ✓             | -            | ✓            | -                   | -          | ✓                 | ✓              | ✓              | ✓              | ✓             | ✓             | *         | ✓                  | *                | *                     | ✓                   | -            | ✓              | ✓               | -             | ✓           | 16    |
| Activity tracking                        | ✓             | ✓            | ✓            | ✓                   | ✓          | -                 | ✓              | -              | ✓              | ✓             | -             | ✓         | ✓                  | ✓                | ✓                     | -                   | ✓            | -              | ✓               | *             | -           | 15    |
| Reminders and prompts                    | -             | -            | ✓            | ✓                   | -          | -                 | ✓              | ✓              | ✓              | -             | -             | ✓         | *                  | -                | ✓                     | -                   | ✓            | ✓              | -               | *             | -           | 11    |
| Diet tracking                            | ✓             | -            | ✓            | ✓                   | ✓          | -                 | -              | -              | ✓              | -             | -             | ✓         | ✓                  | -                | -                     | -                   | ✓            | -              | ✓               | ✓             | -           | 10    |
| Weight and biomeasure tracking           | -             | ✓            | ✓            | ✓                   | -          | -                 | ✓              | -              | ✓              | -             | -             | ✓         | ✓                  | -                | -                     | -                   | ✓            | -              | -               | *             | -           | 9     |
| Total passive features                   | 3             | 2            | 5            | 4                   | 2          | 1                 | 4              | 2              | 5              | 2             | 1             | 5         | 5                  | 2                | 3                     | 1                   | 4            | 2              | 3               | 4             | 1           |       |
| Interactive Features                     |               |              |              |                     |            |                   |                |                |                |               |               |           |                    |                  |                       |                     |              |                |                 |               |             |       |
| Interactive health and lifestyle lessons | -             | ✓            | ✓            | *                   | ✓          | -                 | -              | -              | ✓              | -             | -             | -         | -                  | -                | -                     | -                   | *            | ✓              | ✓               | *             | -           | 9     |
| Online health coaching                   | -             | ✓            | -            | ✓                   | -          | -                 | -              | -              | -              | -             | -             | ✓         | ✓                  | -                | ✓                     | -                   | ✓            | -              | ✓               | ✓             | -           | 8     |
| Social media and support                 | -             | -            | ✓            | ✓                   | -          | -                 | -              | -              | -              | -             | ✓             | -         | ✓                  | -                | -                     | -                   | ✓            | ✓              | ✓               | ✓             | -           | 8     |
| Automated feedback                       | -             | -            | ✓            | -                   | -          | ✓                 | ✓              | -              | ✓              | -             | -             | -         | -                  | -                | -                     | -                   | -            | -              | -               | -             | -           | 4     |
| Gamification                             | -             | -            | ✓            | -                   | -          | -                 | -              | -              | -              | -             | -             | -         | -                  | -                | -                     | -                   | -            | -              | -               | -             | -           | 1     |
| Total interactive features               | 0             | 2            | 4            | 3                   | 1          | 1                 | 1              | 0              | 2              | 0             | 1             | 1         | 2                  | 0                | 1                     | 0                   | 3            | 2              | 3               | 3             | 0           |       |
| Total digital features                   | 3             | 4            | 9            | 7                   | 3          | 2                 | 5              | 2              | 7              | 2             | 2             | 6         | 7                  | 2                | 4                     | 1                   | 7            | 4              | 6               | 7             | 1           |       |

Note: ✓ Feature explicitly present; \*Feature identified via imputation.

Supplementary Table 6.

*Summary of Behaviour Change Technique Use in Effective and Non-Effective Interventions (Excludes Imputed BCTs)*

| No.                                  | Behaviour Change Technique                  | All interventions<br>(N = 21) |      | Effective ST<br>(N = 12) |      | Not Effective ST<br>(N = 7) |      | Effective LT<br>(N = 4) |     | Not-Effective LT<br>(N = 8) |      |
|--------------------------------------|---------------------------------------------|-------------------------------|------|--------------------------|------|-----------------------------|------|-------------------------|-----|-----------------------------|------|
|                                      |                                             | n                             | %    | n                        | %    | n                           | %    | n                       | %   | n                           | %    |
| Cluster One: Goals and planning      |                                             |                               |      |                          |      |                             |      |                         |     |                             |      |
| 1.1                                  | Goal setting (behaviour)                    | 8                             | 38.1 | 4                        | 33.3 | 3                           | 42.9 | 1                       | 25  | 2                           | 25   |
| 1.2                                  | Problem solving                             | 9                             | 42.9 | 4                        | 33.3 | 3                           | 42.9 | 2                       | 50  | 2                           | 25   |
| 1.3                                  | Goal setting (outcome)                      | 9                             | 42.9 | 6                        | 50   | 2                           | 28.6 | 2                       | 50  | 3                           | 37.5 |
| 1.4                                  | Action planning                             | 4                             | 19   | 3                        | 25   | 1                           | 14.3 | 1                       | 25  | 0                           | 0    |
| 1.5                                  | Review behaviour goals                      | 3                             | 14.3 | 2                        | 16.7 | 1                           | 14.3 | 1                       | 25  | 0                           | 0    |
| 1.7                                  | Review outcome goals                        | 1                             | 4.8  | 1                        | 8.3  | 0                           | 0    | 0                       | 0   | 0                           | 0    |
| Cluster Two: Feedback and monitoring |                                             |                               |      |                          |      |                             |      |                         |     |                             |      |
| 2.2                                  | Feedback on behaviour                       | 9                             | 42.9 | 6                        | 50   | 2                           | 28.6 | 2                       | 50  | 3                           | 37.5 |
| 2.3                                  | Self-monitoring of behaviour                | 16                            | 76.2 | 11                       | 91.7 | 4                           | 57.1 | 3                       | 75  | 6                           | 75   |
| 2.4                                  | Self-monitoring of outcome(s) of behaviour  | 15                            | 71.4 | 11                       | 91.7 | 3                           | 42.9 | 4                       | 100 | 6                           | 75   |
| 2.7                                  | Feedback on outcome(s) of behaviour         | 1                             | 4.8  | 0                        | 0    | 0                           | 0    | 0                       | 0   | 0                           | 0    |
| Cluster Three: Social support        |                                             |                               |      |                          |      |                             |      |                         |     |                             |      |
| 3.1                                  | Social support (unspecified)                | 9                             | 42.9 | 8                        | 66.7 | 1                           | 14.3 | 2                       | 50  | 4                           | 50   |
| 3.2                                  | Social support (practical)                  | 1                             | 4.8  | 0                        | 0    | 1                           | 14.3 | 0                       | 0   | 1                           | 12.5 |
| 3.3                                  | Social support (emotional)                  | 2                             | 9.5  | 1                        | 8.3  | 1                           | 14.3 | 0                       | 0   | 1                           | 12.5 |
| Cluster Four: Shaping knowledge      |                                             |                               |      |                          |      |                             |      |                         |     |                             |      |
| 4.1                                  | Instruction on how to perform the behaviour | 4                             | 19   | 1                        | 8.3  | 1                           | 14.3 | 0                       | 0   | 1                           | 12.5 |
| 4.2                                  | Information about antecedents               | 2                             | 9.5  | 1                        | 8.3  | 1                           | 14.3 | 1                       | 25  | 1                           | 12.5 |
| Cluster Five: Natural consequences   |                                             |                               |      |                          |      |                             |      |                         |     |                             |      |
| 5.1                                  | Information about health consequences       | 5                             | 23.8 | 2                        | 16.7 | 2                           | 28.6 | 0                       | 0   | 2                           | 25   |

| No.                                        | Behaviour Change Technique                            | All interventions<br>( <i>N</i> = 21) |      | Effective ST<br>( <i>N</i> = 12) |      | Not Effective ST<br>( <i>N</i> = 7) |      | Effective LT<br>( <i>N</i> = 4) |    | Not-Effective LT<br>( <i>N</i> = 8) |      |
|--------------------------------------------|-------------------------------------------------------|---------------------------------------|------|----------------------------------|------|-------------------------------------|------|---------------------------------|----|-------------------------------------|------|
|                                            |                                                       | <i>n</i>                              | %    | <i>n</i>                         | %    | <i>n</i>                            | %    | <i>n</i>                        | %  | <i>n</i>                            | %    |
| Cluster Six: Comparison of behaviour       |                                                       |                                       |      |                                  |      |                                     |      |                                 |    |                                     |      |
| 6.1                                        | Demonstration of the behaviour                        | 2                                     | 9.5  | 1                                | 8.3  | 1                                   | 14.3 | 0                               | 0  | 0                                   | 0    |
| 6.2                                        | Social comparison                                     | 3                                     | 14.3 | 3                                | 25   | 0                                   | 0    | 1                               | 25 | 1                                   | 12.5 |
| Cluster Seven: Associations                |                                                       |                                       |      |                                  |      |                                     |      |                                 |    |                                     |      |
| 7.1                                        | Prompts/cues                                          | 2                                     | 9.5  | 1                                | 8.3  | 1                                   | 14.3 | 1                               | 25 | 0                                   | 0    |
| Cluster Eight: Repetition and substitution |                                                       |                                       |      |                                  |      |                                     |      |                                 |    |                                     |      |
| 8.2                                        | Behaviour substitution                                | 3                                     | 14.3 | 1                                | 8.3  | 1                                   | 14.3 | 0                               | 0  | 1                                   | 12.5 |
| 8.3                                        | Habit formation                                       | 2                                     | 9.5  | 2                                | 16.7 | 0                                   | 0    | 0                               | 0  | 0                                   | 0    |
| 8.4                                        | Habit reversal                                        | 1                                     | 4.8  | 1                                | 8.3  | 0                                   | 0    | 0                               | 0  | 0                                   | 0    |
| 8.7                                        | Graded tasks                                          | 1                                     | 4.8  | 1                                |      | 0                                   | 0    | 0                               | 0  | 0                                   | 0    |
| Cluster Nine: Comparison of outcomes       |                                                       |                                       |      |                                  |      |                                     |      |                                 |    |                                     |      |
| 9.1                                        | Credible source                                       | 7                                     | 33.3 | 5                                | 41.7 | 1                                   | 14.3 | 2                               | 50 | 2                                   | 25   |
| Cluster Ten: Reward and threat             |                                                       |                                       |      |                                  |      |                                     |      |                                 |    |                                     |      |
| 10.1                                       | Material incentive (behaviour)                        | 1                                     | 4.8  | 1                                | 8.3  | 0                                   | 0    | 0                               | 0  | 0                                   | 0    |
| 10.2                                       | Material reward (behaviour)                           | 1                                     | 4.8  | 1                                | 8.3  | 0                                   | 0    | 0                               | 0  | 0                                   | 0    |
| Cluster Eleven: Regulation                 |                                                       |                                       |      |                                  |      |                                     |      |                                 |    |                                     |      |
| 11.2                                       | Reduce negative emotions                              | 3                                     | 14.3 | 1                                | 8.3  | 1                                   | 14.3 | 0                               | 0  | 1                                   | 12.5 |
| Cluster Twelve Antecedents                 |                                                       |                                       |      |                                  |      |                                     |      |                                 |    |                                     |      |
| 12.3                                       | Avoidance/reducing exposure to cues for the behaviour | 1                                     | 4.8  | 0                                | 0    | 1                                   | 14.3 | 0                               | 0  | 1                                   | 12.5 |
| 12.5                                       | Adding objects to the environment                     | 8                                     | 38.1 | 7                                | 58.3 | 0                                   | 0    | 3                               | 75 | 2                                   | 25   |
| Cluster Fourteen: Scheduled consequences   |                                                       |                                       |      |                                  |      |                                     |      |                                 |    |                                     |      |
| 14.4                                       | Reward approximation                                  | 1                                     | 4.8  | 0                                | 0    | 1                                   | 14.3 | 0                               | 0  | 0                                   | 0    |
| Average number of BCTs per intervention    |                                                       | 6.4                                   |      | 7.2                              |      | 4.7                                 |      | 6.5                             |    | 5                                   |      |

*Note:* ST: short term ( $\leq 6$  month) follow-up; LT: long term ( $\geq 12$  month) follow-up. *N*: number of interventions; *n*: number of interventions in which the BCT was identified; %: proportion of interventions in each category that used the BCT.

Supplementary Table 7.

*Summary of Digital Feature Use in Effective and Non-Effective Interventions (Excludes Imputed Features)*

| Digital features                              | All interventions<br>(N = 21) |      | Effective ST<br>(N = 12) |      | Not Effective ST<br>(N = 7) |      | Effective LT<br>(N = 4) |     | Not-Effective LT<br>(N = 8) |      |
|-----------------------------------------------|-------------------------------|------|--------------------------|------|-----------------------------|------|-------------------------|-----|-----------------------------|------|
|                                               | <i>n</i>                      | %    | <i>n</i>                 | %    | <i>n</i>                    | %    | <i>n</i>                | %   | <i>n</i>                    | %    |
| Passive features                              |                               |      |                          |      |                             |      |                         |     |                             |      |
| Health and lifestyle information and advice   | 13                            | 61.9 | 6                        | 50   | 6                           | 85.7 | 1                       | 25  | 5                           | 62.5 |
| Activity tracking                             | 14                            | 66.7 | 11                       | 91.7 | 2                           | 28.6 | 4                       | 100 | 3                           | 37.5 |
| Reminders and prompts                         | 9                             | 42.9 | 6                        | 50   | 3                           | 42.9 | 3                       | 75  | 3                           | 37.5 |
| Diet tracking                                 | 10                            | 47.6 | 9                        | 75   | 1                           | 14.3 | 3                       | 75  | 3                           | 37.5 |
| Weight and biomeasure tracking                | 8                             | 38.1 | 6                        | 50   | 1                           | 14.3 | 3                       | 75  | 1                           | 12.5 |
| Average passive features per intervention     | 2.57 features                 |      | 3.2 features             |      | 1.86 features               |      | 3.5 features            |     | 1.88 features               |      |
| Interactive features                          |                               |      |                          |      |                             |      |                         |     |                             |      |
| Interactive health and lifestyle lessons      | 6                             | 28.6 | 3                        | 25   | 2                           | 28.6 | 0                       | 0   | 2                           | 25   |
| Social media and support                      | 8                             | 38.1 | 6                        | 50   | 2                           | 28.6 | 2                       | 50  | 5                           | 62.5 |
| Online health coaching                        | 8                             | 38.1 | 7                        | 58.3 | 0                           | 12.5 | 4                       | 100 | 3                           | 37.5 |
| Automated feedback                            | 4                             | 19.0 | 2                        | 16.7 | 2                           | 28.6 | 0                       | 0   | 0                           | 0    |
| Gamification                                  | 1                             | 4.8  | 1                        | 8.3  | 0                           | 0    | 0                       | 0   | 0                           | 0    |
| Average interactive features per intervention | 1.29 features                 |      | 1.58 features            |      | 0.86 features               |      | 1.5 features            |     | 1.25 feature                |      |
| Average total features per intervention       | 3.86                          |      | 4.75                     |      | 2.71                        |      | 5                       |     | 3.13                        |      |

*Note:* ST: short term ( $\leq 6$  month) follow-up; LT: long term ( $\geq 12$  month) follow-up. *N*: number of interventions; *n*: number of interventions in which the feature was identified; %: proportion of interventions in each category that used the digital feature.

Supplementary Table 8.

*BCTs: Most Frequently Identified and Most Effective by Imputation vs No Imputation*

| BCTs most frequently identified in effective interventions (short term) |                                           |
|-------------------------------------------------------------------------|-------------------------------------------|
| With imputations included                                               | With imputations excluded                 |
| Goal setting (behaviour)                                                | Goal setting (behaviour)                  |
| Problem solving                                                         | Problem solving                           |
| Goal setting (outcome)                                                  | Goal setting (outcome)                    |
| Feedback on behavior                                                    | Feedback on behavior                      |
| Self-monitoring of behavior                                             | Self-monitoring of behavior               |
| Self-monitoring of outcome(s) of behavior                               | Self-monitoring of outcome(s) of behavior |
| Social support (unspecified)                                            | Social support (unspecified)              |
| Adding objects to the environment                                       | Credible source                           |
|                                                                         | Adding objects to the environment         |
| BCTs most frequently identified in effective interventions (long term)  |                                           |
| With imputations included                                               | With imputations excluded                 |
| Goal setting (behaviour)                                                | Problem solving                           |
| Problem solving                                                         | Goal setting (outcome)                    |
| Goal setting (outcome)                                                  | Feedback on behavior                      |
| Feedback on behavior                                                    | Self-monitoring of behavior               |
| Self-monitoring of behavior                                             | Self-monitoring of outcome(s) of behavior |
| Self-monitoring of outcome(s) of behavior                               | Social support (unspecified)              |
| Social support (unspecified)                                            | Credible source                           |
| Adding objects to the environment                                       | Adding objects to the environment         |
| Most effective BCTs (short term)                                        |                                           |
| With imputations included                                               | With imputations excluded                 |
| Social support (unspecified)                                            | Social support (unspecified)              |
| Adding objects to the environment                                       | Adding objects to the environment         |
| Most effective BCTs (long term)                                         |                                           |
| With imputations included                                               | With imputations excluded                 |
| Problem solving                                                         | Adding objects to the environment         |

*Note:* The eight most frequently identified BCTs under each condition are listed. Nine BCTs are listed in the ‘imputations excluded’ column in the short term as two BCTs each registered the 8<sup>th</sup> highest frequency. The most effective BCTs were those identified at a considerably greater frequency in effective interventions versus non-effective interventions. All BCTs are listed in the order in which they appear in the BCT Taxonomy v1.



Supplementary Table 9.

*Digital Features: Most Frequently Identified and Most Effective by Imputation vs No Imputation*

| Digital features most frequently identified in effective interventions (short term) |                                          |
|-------------------------------------------------------------------------------------|------------------------------------------|
| With imputations included                                                           | With imputations excluded                |
| Health and lifestyle info and advice (P)                                            | Activity tracking (P)                    |
| Activity tracking (P)                                                               | Diet tracking (P)                        |
| Diet tracking (P)                                                                   | Online health coaching (I)               |
| Digital features most frequently identified in effective interventions (long term)  |                                          |
| With imputations included                                                           | With imputations excluded                |
| Activity tracking (P)                                                               | Health and lifestyle info and advice (P) |
| Reminders and prompts (P)                                                           | Activity tracking (P)                    |
| Online health coaching (I)                                                          | Diet tracking (P)                        |
|                                                                                     | Online health coaching (I)               |
| Most effective digital features (short term)                                        |                                          |
| With imputations included                                                           | With imputations excluded                |
| Activity tracking (P)                                                               | Activity tracking (P)                    |
| Diet tracking (P)                                                                   | Diet tracking (P)                        |
| Online health coaching (I)                                                          |                                          |
| Most effective digital features (long term)                                         |                                          |
| With imputations included                                                           | With imputations excluded                |
| Activity tracking (P)                                                               | Activity tracking (P)                    |
| Reminders and prompts (P)                                                           | Weight and biomeasure tracking (P)       |
| Weight and biomeasure tracking (P)                                                  | Online health coaching (I)               |
| Online health coaching (I)                                                          |                                          |

*Note:* P: passive feature; I: interactive feature

The three most frequently identified features under each condition are listed. Four digital features are listed in the ‘imputations excluded’ column in the long term as two features each registered the 3<sup>rd</sup> highest frequency. The most effective features were those identified at a considerably greater frequency in effective interventions versus non-effective interventions. All features are listed in the order in which they appear in the summary tables.

Supplementary Table 10.

*Average Number of BCTs and Digital Features Used Per Intervention, both Including and Excluding Imputations*

| Average number of digital features used |                      |                      | Average number of BCTs used          |                      |                      |
|-----------------------------------------|----------------------|----------------------|--------------------------------------|----------------------|----------------------|
|                                         | Imputations included | Imputations excluded |                                      | Imputations included | Imputations excluded |
| All interventions ( $N = 21$ )          |                      |                      | All interventions ( $N = 21$ )       | 9                    | 6.4                  |
| Total features                          | 4.3                  | 3.86                 | Effective short term ( $N = 12$ )    | 11.3                 | 7.2                  |
| Passive features                        | 2.9                  | 2.57                 | Not effective short term ( $N = 7$ ) | 5.4                  | 4.7                  |
| Interactive features                    | 1.43                 | 1.29                 | Effective long term ( $N = 4$ )      | 11.5                 | 6.5                  |
| Effective short term ( $N = 12$ )       |                      |                      | Not effective long term ( $N = 8$ )  | 7.8                  | 3.7                  |
| Total features                          | 5.58                 | 4.75                 |                                      |                      |                      |
| Passive features                        | 3.75                 | 3.2                  |                                      |                      |                      |
| Interactive features                    | 1.83                 | 1.58                 |                                      |                      |                      |
| Not effective short term ( $N = 7$ )    |                      |                      |                                      |                      |                      |
| Total features                          | 2.71                 | 2.71                 |                                      |                      |                      |
| Passive features                        | 1.86                 | 1.86                 |                                      |                      |                      |
| Interactive features                    | 0.86                 | 0.86                 |                                      |                      |                      |
| Effective long term ( $N = 4$ )         |                      |                      |                                      |                      |                      |
| Total features                          | 6                    | 5                    |                                      |                      |                      |
| Passive features                        | 4.25                 | 3.5                  |                                      |                      |                      |
| Interactive features                    | 1.75                 | 1.5                  |                                      |                      |                      |
| Not effective long term ( $N = 8$ )     |                      |                      |                                      |                      |                      |
| Total features                          | 3.88                 | 3.13                 |                                      |                      |                      |
| Passive features                        | 2.38                 | 1.88                 |                                      |                      |                      |
| Interactive features                    | 1.5                  | 1.25                 |                                      |                      |                      |
