# Supplementary material for: A systematic review of the behaviour change techniques and digital features in technology-driven type 2 diabetes prevention interventions
Source: PubMed Central journal article supplement (PMC7093696; doi:10.1177/2055207620914427), 2020-03-24
Supplement: DHJ914427_Supplementary_Material5.pdf [file DHJ914427_Supplementary_Material5.pdf]

## **All Coded Digital and Non-digital Components**

### Key:

MoD = Mode of Delivery

SMS = Short Message Service (text message)

IVR = Interactive Voice Response

Web = Website

DVD = Digital Video Disc

SCU = Self-contained unit

App = Smartphone application

E/S = Email and SMS

W/E = Website and email

W/I = Website and IVR

A/S = Smartphone app and SMS

W/A = Website and smartphone app

S/E = SMS and email

Physical Per. = Physical Peripheral

\*Denotes imputed components

| Technological Components and Features |     |                              |         | Study                | Non-Technological Components |                           |
|---------------------------------------|-----|------------------------------|---------|----------------------|------------------------------|---------------------------|
| Digital Component                     | MoD | Feature                      | Level   |                      | Format                       | Non-Digital Component     |
| Food Information                      | Web | Health/Lifestyle Information | Passive | <b>Aguiar (2014)</b> | Hard Copy                    | Nutrition Education       |
| Weight Loss Information               | DVD | Health/Lifestyle Information | Passive |                      | Hard Copy                    | Exercise Education        |
| Pedometer                             | SCU | Activity Tracking            | Passive |                      | Hard Copy                    | Exercise Diary            |
| Physical Activity Diary               | Web | Activity Tracking            | Passive |                      | Hard Copy                    | Weight Log                |
| Food Diary                            | Web | Diet Tracking                | Passive |                      | Hard Copy                    | Food Diary                |
|                                       |     |                              |         |                      | Hard Copy                    | Waist Circumferene Log    |
|                                       |     |                              |         |                      | Hard Copy                    | Resistance Training Guide |
|                                       |     |                              |         |                      | Physical Per.                | Tape Measure              |
|                                       |     |                              |         |                      | Physical Per.                | Gymstick Resistance Band  |

|                                |     |                            |             |                     |              |                             |
|--------------------------------|-----|----------------------------|-------------|---------------------|--------------|-----------------------------|
| Blood Glucose Log              | App | Weight/Biomeasure Tracking | Passive     | <b>Arens (2018)</b> | Face-to-Face | Nutrition Education         |
| Blood Glucose Measuring Device | SCU | Weight/Biomeasure Tracking | Passive     |                     | Face-to-Face | Physical Activity Education |
| Weight Log                     | App | Weight/Biomeasure Tracking | Passive     |                     | Face-to-Face | Health Coaching             |
| Waist Circumference Log        | App | Weight/Biomeasure Tracking | Passive     |                     |              |                             |
| Blood Pressure Log             | App | Weight/Biomeasure Tracking | Passive     |                     |              |                             |
| Pedometer                      | SCU | Activity tracking          | Passive     |                     |              |                             |
| Online Health Coaching         | App | Online Health Coaching     | Interactive |                     |              |                             |
| Attitudes Questionnaire        | App | Health/Lifestyle lessons   | Interactive |                     |              |                             |

| Technological Components and Features |     |         |       | Study | Non-Technological Components |                       |
|---------------------------------------|-----|---------|-------|-------|------------------------------|-----------------------|
| Digital Component                     | MoD | Feature | Level |       | Format                       | Non-Digital Component |

|                                   |     |                              |             |                     |
|-----------------------------------|-----|------------------------------|-------------|---------------------|
| Push Notifications                | App | Reminders/Prompts            | Passive     | <b>Block (2015)</b> |
| Reminders                         | E/S | Reminders/Prompts            | Passive     |                     |
| Weight Log                        | Web | Weight/Biomeasure Tracking   | Passive     |                     |
| Activity Log                      | Web | Activity Tracking            | Passive     |                     |
| Diet Log                          | Web | Diet Tracking                | Passive     |                     |
| Links to External Resources       | W/E | Health/Lifestyle Information | Passive     |                     |
| Physical Activity Assessment      | Web | Health/Lifestyle Lessons     | Interactive |                     |
| Dietary Assessment                | Web | Health/Lifestyle Lessons     | Interactive |                     |
| Behavioural Strategy Lessons      | Web | Health/Lifestyle Lessons     | Interactive |                     |
| Diet Lessons                      | Web | Health/Lifestyle Lessons     | Interactive |                     |
| Physical Activity Lessons         | Web | Health/Lifestyle Lessons     | Interactive |                     |
| Downloadable Worksheets           | W/E | Health/Lifestyle Lessons     | Interactive |                     |
| Online Points/Currency System     | Web | Gamification                 | Interactive |                     |
| Team Challaneges                  | Web | Gamification                 | Interactive |                     |
| Social Message Board              | Web | Social Media and Support     | Interactive |                     |
| Family and Friend Referral System | Web | Social Media and Support     | Interactive |                     |
| Automated Health Coaching         | W/I | Automated Feedback           | Interactive |                     |

|                            |     |                            |             |                            |               |                            |
|----------------------------|-----|----------------------------|-------------|----------------------------|---------------|----------------------------|
| Weight Log                 | W/A | Weight/Biomeasure Tracking | Passive     | <b>Castro Sweet (2018)</b> | Hard Copy     | Resistance Exercise Guide* |
| Wireless Scale             | SCU | Weight/Biomeasure Tracking | Passive     |                            | Hard Copy     | Diet Log*                  |
| Pedometer                  | SCU | Activity Tracking          | Passive     |                            | Physical Per. | Resistance Band*           |
| Physical Activity Log      | W/A | Activity Tracking          | Passive     |                            | Physical Per. | Measuring Tape*            |
| Diet Log                   | W/A | Diet Tracking              | Passive     |                            |               |                            |
| Weight Notifications       | W/A | Reminders/Prompts          | Passive     |                            |               |                            |
| Health/Lifestyle Lessons*  | W/A | Health/Lifestyle Lessons   | Interactive |                            |               |                            |
| Physical Activity Lessons* | W/A | Health/Lifestyle Lessons   | Interactive |                            |               |                            |
| Diet Lessons*              | W/A | Health/Lifestyle Lessons   | Interactive |                            |               |                            |
| Online Social Forum        | W/A | Social Media and Support   | Interactive |                            |               |                            |
| Online Health Coaching     | W/A | Online Health Coaching     | Interactive |                            |               |                            |

| Technological Components and Features |     |                              |             | Study                | Non-Technological Components |                              |
|---------------------------------------|-----|------------------------------|-------------|----------------------|------------------------------|------------------------------|
| Digital Component                     | MoD | Feature                      | Level       |                      | Format                       | Non-Digital Component        |
| Physical Activity Log                 | App | Activity Tracking            | Passive     | Cha<br>(2014)        | Face-to-Face                 | Nutrition Education          |
| Food Log                              | App | Diet Tracking                | Passive     |                      | Face-to-Face                 | Exercise Education           |
| Homework Assignments                  | A/W | Health/lifestyle lessons     | Interactive |                      | Face-to-Face                 | Health Counseling            |
|                                       |     |                              |             |                      | Hard Copy                    | Health Summary               |
|                                       |     |                              |             |                      | Hard Copy                    | Educational Materials        |
| Physical Activity Tips                | IVR | Health/Lifestyle Information | Passive     | Estabrooks<br>(2008) | Face-to-Face                 | Healthy Lifestyle Education  |
| Nutrition Tips                        | IVR | Health/Lifestyle Information | Passive     |                      |                              |                              |
| Automated Diet Coaching               | IVR | Automated Feedback           | Interactive |                      |                              |                              |
| Automated PA Coaching                 | IVR | Automated Feedback           | Interactive |                      |                              |                              |
| Weight Loss Advice                    | App | Health/Lifestyle Information | Passive     | Everett<br>(2018)    | Face-to-Face                 | Lifestyle Counseling         |
| Diet Advice                           | App | Health/Lifestyle Information | Passive     |                      | Hard Copy                    | T2D Prevention Information   |
| Physical Activity Advice              | App | Health/Lifestyle Information | Passive     |                      |                              |                              |
| Digital Body Weight Scale             | SCU | Weight/Biomeasure Tracking   | Passive     |                      |                              |                              |
| Weight Log                            | App | Weight/Biomeasure Tracking   | Passive     |                      |                              |                              |
| Weight Notifications                  | App | Reminders/Prompts            | Passive     |                      |                              |                              |
| Personalised Push Notifications       | App | Reminders/Prompts            | Passive     |                      |                              |                              |
| Automated Physical Activity Coaching  | App | Automated Feedback           | Interactive |                      |                              |                              |
| Health/lifestyle Advice               | SMS | Health/Lifestyle Information | Passive     | Fischer<br>(2016)    | Face-to-Face                 | Diet Support                 |
| Physical Activity Advice              | SMS | Health/Lifestyle Information | Passive     |                      | Face-to-Face*                | Health/Lifestyle Education*  |
| Nutrition Advice                      | SMS | Health/Lifestyle Information | Passive     |                      | Face-to-Face*                | Physical Activity Education* |
| Links to Additional Resources         | SMS | Health/Lifestyle Information | Passive     |                      | Face-to-Face*                | Nutrition Education*         |
| Weight Report Reminders               | SMS | Reminders/Prompts            | Passive     |                      | Phone                        | Motivational Interviewing    |

| Technological Components and Features |     |                              |             | Study                     | Non-Technological Components |                              |
|---------------------------------------|-----|------------------------------|-------------|---------------------------|------------------------------|------------------------------|
| Digital Component                     | MoD | Feature                      | Level       |                           | Format                       | Non-Digital Component        |
| Health/lifestyle Videos               | App | Health/Lifestyle Information | Passive     | <b>Fukuoka<br/>(2015)</b> | Face-to-Face                 | Health/Lifestyle Education   |
| Physical Activity Videos              | App | Health/Lifestyle Information | Passive     |                           | Face-to-Face                 | Physical Activity Education  |
| Diet Videos                           | App | Health/Lifestyle Information | Passive     |                           | Face-to-Face                 | Diet Education               |
| Pedometer                             | A/S | Activity Tracking            | Passive     |                           |                              |                              |
| Physical Activity Log                 | App | Activity Tracking            | Passive     |                           |                              |                              |
| Reminders                             | A/S | Reminders/Prompts            | Passive     |                           |                              |                              |
| Weight Log                            | App | Weight/Biomeasure Tracking   | Passive     |                           |                              |                              |
| Diet Log                              | App | Diet Tracking                | Passive     |                           |                              |                              |
| Auto Self-Monitoring Feedback         | App | Automated Feedback           | Interactive |                           |                              |                              |
| Health/Lifestyle Messages             | App | Automated Feedback           | Interactive |                           |                              |                              |
| Physical Activity Messages            | App | Automated Feedback           | Interactive |                           |                              |                              |
| Diet Messages                         | App | Automated Feedback           | Interactive |                           |                              |                              |
| Health/Lifestyle Quizzes              | App | Health/Lifestyle Lessons     | Interactive |                           |                              |                              |
| Physical Activity Quizzes             | App | Health/Lifestyle Lessons     | Interactive |                           |                              |                              |
| Diet Education Quizzes                | App | Health/Lifestyle Lessons     | Interactive |                           |                              |                              |
| Health/Lifestyle Education Videos     | DVD | Health/Lifestyle Information | Passive     | <b>Kramer<br/>(2010)</b>  | Hard Copy                    | Health/Lifestyle Worksheets  |
| Physical Activity Education Videos    | DVD | Health/Lifestyle Information | Passive     |                           | Hard Copy                    | Physical Activity Worksheets |
| Nutrition Education Videos            | DVD | Health/Lifestyle Information | Passive     |                           | Hard Copy                    | Nutrition Worksheets         |
| Pedometer                             | SCU | Activity Tracking            | Passive     |                           | Hard Copy                    | Weight Log*                  |
|                                       |     |                              |             |                           | Hard Copy                    | Physical Activity Log        |
|                                       |     |                              |             |                           | Hard Copy                    | Diet Log                     |
|                                       |     |                              |             |                           | Hard Copy                    | Pedometer Guide*             |
|                                       |     |                              |             |                           | Hard Copy                    | Resistance Training Guide*   |
|                                       |     |                              |             |                           | Hard Copy                    | Stretching Guide*            |
|                                       |     |                              |             |                           | Physical Per.                | Resistance Bands*            |
|                                       |     |                              |             | Phone                     | Remote Health Coaching       |                              |

| Technological Components and Features |       |                              |             | Study                 | Non-Technological Components |                               |
|---------------------------------------|-------|------------------------------|-------------|-----------------------|------------------------------|-------------------------------|
| Digital Component                     | MoD   | Feature                      | Level       |                       | Format                       | Non-Digital Component         |
| Lifestyle Advice                      | SM/E  | Health/Lifestyle Information | Passive     | Limaye<br>(2017)      | Hard Copy                    | Diet Information              |
| Physical Activity Advice              | SM/E  | Health/Lifestyle Information | Passive     |                       | Hard Copy                    | Physical Activity Information |
| Diet Advice                           | SM/E  | Health/Lifestyle Information | Passive     |                       | Face-to-Face                 | Lifestyle Modification Class  |
| Stress Management Advice              | SM/E  | Health/Lifestyle Information | Passive     |                       |                              |                               |
| Facebook Group                        | Web   | Social Media and Support     | Interactive |                       |                              |                               |
| Health/Lifestyle Education Videos*    | DVD   | Health/Lifestyle Information | Passive     | Ma<br>(2013)          | Hard Copy                    | Health/lifestyle worksheets*  |
| Physical Activity Education Videos*   | DVD   | Health/Lifestyle Information | Passive     |                       | Hard Copy                    | Physical activity worksheets* |
| Nutrition Education Videos*           | DVD   | Health/Lifestyle Information | Passive     |                       | Hard Copy                    | Nutrition Worksheets*         |
| Pedometer                             | SCU   | Activity Tracking            | Passive     |                       | Hard Copy                    | Pedometer Guide*              |
| Physical Activity Log                 | Web   | Activity Tracking            | Passive     |                       | Hard Copy                    | Resistance Training Guide*    |
| Reminders                             | Email | Reminders/Prompts            | Passive     |                       | Hard Copy                    | Stretching Guide*             |
| Weight Log                            | Web   | Weight/Biomeasure Tracking   | Passive     |                       | Physical Per.                | Resistance Bands*             |
| Diet Log                              | Web   | Diet Tracking                | Passive     |                       | Physical Per.                | Weight Scale                  |
| Online Health Coaching                | Web   | Online Health Coaching       | Interactive |                       |                              |                               |
| Health/Lifestyle Education            | App   | Health/Lifestyle Information | Passive     | Michaelides<br>(2016) | Phone                        | Remote Health Counseling      |
| Physical Activity Education           | App   | Health/Lifestyle Information | Passive     |                       |                              |                               |
| Diet Education                        | App   | Health/Lifestyle Information | Passive     |                       |                              |                               |
| Health/Lifestyle Challenges*          | App   | Reminders/Prompts            | Passive     |                       |                              |                               |
| Physical Activity Challenges*         | App   | Reminders/Prompts            | Passive     |                       |                              |                               |
| Diet Challenges*                      | App   | Reminders/Prompts            | Passive     |                       |                              |                               |
| Weight Log                            | App   | Weight/Biomeasure Tracking   | Passive     |                       |                              |                               |
| Physical Activity Log                 | App   | Activity Tracking            | Passive     |                       |                              |                               |
| Diet Log                              | App   | Diet Tracking                | Passive     |                       |                              |                               |
| Online Health Coaching                | App   | Online Health Coaching       | Interactive |                       |                              |                               |
| Group Messaging                       | App   | Social Media and Support     | Interactive |                       |                              |                               |

| Technological Components and Features |     |                              |         | Study                                 | Non-Technological Components |                              |
|---------------------------------------|-----|------------------------------|---------|---------------------------------------|------------------------------|------------------------------|
| Digital Component                     | MoD | Feature                      | Level   |                                       | Format                       | Non-Digital Component        |
| Health/Lifestyle Education Videos*    | DVD | Health/Lifestyle Information | Passive | <b>Piatt<br/>(2013)</b><br><i>DVD</i> | Hard Copy                    | Health/Lifestyle Worksheets  |
| Physical Activity Education Videos*   | DVD | Health/Lifestyle Information | Passive |                                       | Hard Copy                    | Physical Activity Worksheets |
| Nutrition Education Videos*           | DVD | Health/Lifestyle Information | Passive |                                       | Hard Copy                    | Nutrition Worksheets         |
| Pedometer                             | SCU | Activity Tracking            | Passive |                                       | Hard Copy                    | Weight Log                   |
|                                       |     |                              |         |                                       | Hard Copy                    | Physical Activity Log        |
|                                       |     |                              |         |                                       | Hard Copy                    | Diet Log                     |
|                                       |     |                              |         |                                       | Hard Copy                    | Pedometer Guide*             |
|                                       |     |                              |         |                                       | Hard Copy                    | Resistance Training Guide*   |
|                                       |     |                              |         |                                       | Hard Copy                    | Stretching Guide*            |
|                                       |     |                              |         |                                       | Physical Per.                | Resistance Bands*            |
|                                       |     |                              |         |                                       | Physical Per.                | Measuring Cups and Spoons    |
|                                       |     |                              |         |                                       | Phone                        | Remote Health Coaching       |
|                                       |     |                              |         |                                       | Face-to-Face                 | Group Debriefing Sessions    |

|                                     |       |                              |             |                                            |               |                              |
|-------------------------------------|-------|------------------------------|-------------|--------------------------------------------|---------------|------------------------------|
| Health/Lifestyle Education Videos*  | Web   | Health/Lifestyle Information | Passive     | <b>Piatt<br/>(2013)</b><br><i>Internet</i> | Hard Copy     | Health/Lifestyle Worksheets  |
| Physical Activity Education Videos* | Web   | Health/Lifestyle Information | Passive     |                                            | Hard Copy     | Physical Activity Worksheets |
| Nutrition Education Videos*         | Web   | Health/Lifestyle Information | Passive     |                                            | Hard Copy     | Nutrition Worksheets         |
| Pedometer                           | SCU   | Activity Tracking            | Passive     |                                            | Hard Copy     | Weight Log                   |
| Reminders/prompts                   | Email | Reminders/Prompts            | Passive     |                                            | Hard Copy     | Physical Activity Log        |
| Online Counseling                   | Web   | Online Health Coaching       | Interactive |                                            | Hard Copy     | Diet Log                     |
|                                     |       |                              |             |                                            | Hard Copy     | Pedometer Guide*             |
|                                     |       |                              |             |                                            | Hard Copy     | Resistance Training guide*   |
|                                     |       |                              |             |                                            | Hard Copy     | Stretching Guide*            |
|                                     |       |                              |             |                                            | Physical Per. | Resistance Bands*            |
|                                     |       |                              |             |                                            | Physical Per. | Measuring Cups and Spoons    |

| Technological Components and Features |       |                              |             | Study                                             | Non-Technological Components |                               |
|---------------------------------------|-------|------------------------------|-------------|---------------------------------------------------|------------------------------|-------------------------------|
| Digital Component                     | MoD   | Feature                      | Level       |                                                   | Format                       | Non-Digital Component         |
| Healty Lifestyle Education            | SMS   | Health/Lifestyle Information | Passive     | Ramachandran<br>(2013)                            | Hard Copy                    | Diet Information              |
| Diet Information                      | SMS   | Health/Lifestyle Information | Passive     |                                                   | Hard Copy                    | Physical Activity Information |
| Physical Activity Information         | SMS   | Health/Lifestyle Information | Passive     |                                                   | Face-to-Face                 | Healty Lifestyle Education    |
| Wireless Scale                        | SCU   | Weight/Biomeasure Tracking   | Passive     | Sepah<br>(2014)                                   | Hard Copy                    | Resistance Exercise Guide*    |
| Weight Log                            | W/A   | Weight/Biomeasure Tracking   | Passive     |                                                   | Hard Copy                    | Diet Log*                     |
| Pedometer                             | SCU   | Activity Tracking            | Passive     |                                                   | Physical Per.                | Resistance Band*              |
| Physical Activity Log                 | W/A   | Activity Tracking            | Passive     |                                                   | Physical Per.                | Measuring Tape*               |
| Diet Log                              | W/A   | Diet Tracking                | Passive     |                                                   | Physical Per.                | Photo Frame                   |
| Weight Notifications                  | W/A   | Reminders/Prompts            | Passive     |                                                   |                              |                               |
| Health/Lifestyle Lessons*             | W/A   | Health/Lifestyle Lessons     | Interactive |                                                   |                              |                               |
| Physical Activity Lessons*            | W/A   | Health/Lifestyle Lessons     | Interactive |                                                   |                              |                               |
| Diet Lessons*                         | W/A   | Health/Lifestyle Lessons     | Interactive |                                                   |                              |                               |
| Online Social Forum                   | W/A   | Social Media and Support     | Interactive |                                                   |                              |                               |
| Online Health Coaching                | W/A   | Online Health Coaching       | Interactive |                                                   |                              |                               |
| Weight Loss Tips                      | Web   | Health/Lifestyle Information | Passive     | Tate<br>(2003)<br><i>Basic Internet</i>           | Face-to-Face                 | Diet Information              |
| Weight Loss Resources                 | Web   | Health/Lifestyle Information | Passive     |                                                   | Face-to-Face                 | Exercise Information          |
| Weight Submission Reminders           | Email | Reminders/Prompts            | Passive     |                                                   | Face-to-Face                 | Behaviour Change Information  |
| Message Board                         | Web   | Social Media and Support     | Interactive |                                                   | Hard Copy                    | Diet Log                      |
| Weight Loss Tutorials                 | Web   | Health/Lifestyle Lessons     | Interactive |                                                   | Hard Copy                    | Exercise Log                  |
| Weight Loss Tips                      | Web   | Health/Lifestyle Information | Passive     | Tate<br>(2003)<br><i>Behavioural e-Counseling</i> | Face-to-Face                 | Diet Information              |
| Weight Loss Resources                 | Web   | Health/Lifestyle Information | Passive     |                                                   | Face-to-Face                 | Exercise Information          |
| Food Diary                            | Web   | Diet Tracking                | Passive     |                                                   | Face-to-Face                 | Behaviour Change Information  |
| Exercise Diary                        | Web   | Activity Tracking            | Passive     |                                                   | Hard Copy                    | Diet Log                      |
| Message Board                         | Web   | Social Media and Support     | Interactive |                                                   | Hard Copy                    | Exercise Log                  |
| Weight Loss Tutorials                 | Web   | Health/Lifestyle Lessons     | Interactive |                                                   |                              |                               |
| Remote Health Coaching                | Email | Online Health Coaching       | Interactive |                                                   |                              |                               |



| Technological Components and Features |     |                              |             | Study                    | Non-Technological Components |                              |
|---------------------------------------|-----|------------------------------|-------------|--------------------------|------------------------------|------------------------------|
| Digital Component                     | MoD | Feature                      | Level       |                          | Format                       | Non-Digital Component        |
| Wireless Scale                        | SCU | Weight/Biomeasure Tracking   | Passive     | <b>Wilson<br/>(2017)</b> | Hard Copy                    | Resistance Exercise Guide*   |
| Weight Log                            | W/A | Weight/Biomeasure Tracking   | Passive     |                          | Hard Copy                    | Diet Log*                    |
| Pedometer*                            | SCU | Activity Tracking            | Passive     |                          | Physical Per.                | Resistance Band*             |
| Physical Activity Log                 | W/A | Activity Tracking            | Passive     |                          | Physical Per.                | Measuring Tape*              |
| Diet Log                              | W/A | Diet Tracking                | Passive     |                          |                              |                              |
| Weight Notifications*                 | W/A | Reminders/Prompts            | Passive     |                          |                              |                              |
| Health/Lifestyle Lessons*             | W/A | Health/Lifestyle Lessons     | Interactive |                          |                              |                              |
| Physical Activity Lessons*            | W/A | Health/Lifestyle Lessons     | Interactive |                          |                              |                              |
| Diet Lessons*                         | W/A | Health/Lifestyle Lessons     | Interactive |                          |                              |                              |
| Online Social Forum                   | W/A | Social Media and Support     | Interactive |                          |                              |                              |
| Online Health Coaching                | W/A | Online Health Coaching       | Interactive |                          |                              |                              |
| T2D/Prediabetes Information           | SMS | Health/Lifestyle Information | Passive     | <b>Wong<br/>(2013)</b>   | Hard Copy                    | T2D/Prediabetes Information  |
| Lifestyle Modification Information    | SMS | Health/Lifestyle Information | Passive     |                          | Hard Copy                    | Health Behaviour Information |
