# Supplementary material for: A systematic review of the behaviour change techniques and digital features in technology-driven type 2 diabetes prevention interventions
Source: PubMed Central journal article supplement (PMC7093696; doi:10.1177/2055207620914427), 2020-03-24
Supplement: DHJ914427_Supplementary_Material7.pdf [file DHJ914427_Supplementary_Material7.pdf]

## **Supplementary material for:**

A Systematic Review of the Behaviour Change Techniques and Digital Features in  
Technology-Driven Type 2 Diabetes Prevention Interventions.

Luke Van Rhoon<sup>a\*</sup>, Molly Byrne<sup>a</sup>, Eimear Morrissey<sup>a</sup>, Jane Murphy<sup>b</sup>, and Jenny McSharry<sup>a</sup>

### **Supplementary File 1:** PRISMA checklist

### **Supplementary File 2:** Search strategy

### **Supplementary File 3:** References for all included articles

### **Supplementary File 4:** Supplementary tables 1-10

- Table 1. Quality Assessment Summaries for All Studies
- Table 2. The Proportion of Baseline Weight Lost at Each Follow-Up for Interventions Included in the Primary Effectiveness Analysis
- Table 3. Changes in Body Weight and Glycaemia from Baseline to Most Recent Follow-up (Expressed in Mean Values Unless Otherwise Indicated)
- Table 4. Behaviour Change Techniques Identified in All Interventions
- Table 5. Digital Features Identified in All Interventions
- Table 6. Summary of Behaviour Change Technique Use in Effective and Non-Effective Interventions (Excludes Imputed BCTs)
- Table 7. Summary of Digital Feature Use in Effective and Non-Effective Interventions (Excludes Imputed Features)
- Table 8. BCTs: Most Frequently Identified and Most Effective by Imputation vs No Imputation
- Table 9. Digital Features: Most Frequently Identified and Most Effective by Imputation vs No Imputation
- Table 10. Average Number of BCTs and Digital Features Used Per Intervention, both Including and Excluding Imputations

### **Supplementary File 5**

All coded digital and non-digital components

### **Supplementary File 6**

Digital feature descriptions
